# Supplementary material for: Waterpipe dependence in university students and effect of normative beliefs: a cross-sectional study
Source: PubMed Central journal article supplement — BMJ Open. 2014 Feb 14;4(2):e004378. doi: 10.1136/bmjopen-2013-004378 (PMC3927928; doi:10.1136/bmjopen-2013-004378), 2014-02-14
Supplement: bmjopen-2013-004378.draft_revisions.pdf [file bmjopen-2013-004378.draft_revisions.pdf]

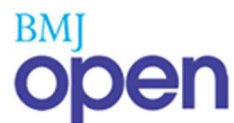

## Waterpipe dependence in university students: effect of normative beliefs

|                                 |                                                                                                                                                                                                                                                                                                                                                                                                            |
|---------------------------------|------------------------------------------------------------------------------------------------------------------------------------------------------------------------------------------------------------------------------------------------------------------------------------------------------------------------------------------------------------------------------------------------------------|
| Journal:                        | <i>BMJ Open</i>                                                                                                                                                                                                                                                                                                                                                                                            |
| Manuscript ID:                  | bmjopen-2013-004378                                                                                                                                                                                                                                                                                                                                                                                        |
| Article Type:                   | Research                                                                                                                                                                                                                                                                                                                                                                                                   |
| Date Submitted by the Author:   | 31-Oct-2013                                                                                                                                                                                                                                                                                                                                                                                                |
| Complete List of Authors:       | Salameh, Pascale; Lebanese University, Clinical and Epidemiological Research Laboratory, Faculty of Pharmacy<br>Salamé, Joseph; Charité – Universitätsmedizin University Hospital, Waked, Mirna; Saint Georges Hospital, Pulmonology<br>Barbour, Bernadette; Lebanese University, Public health<br>Zeidan, Nina; Lebanese University, Public health<br>Baldi, Isabelle; Bordeaux Segalen university, ISPED |
| <b>Primary Subject Heading</b>: | Epidemiology                                                                                                                                                                                                                                                                                                                                                                                               |
| Secondary Subject Heading:      | Epidemiology, Public health, Smoking and tobacco                                                                                                                                                                                                                                                                                                                                                           |
| Keywords:                       | EPIDEMIOLOGY, PUBLIC HEALTH, STATISTICS & RESEARCH METHODS                                                                                                                                                                                                                                                                                                                                                 |
|                                 |                                                                                                                                                                                                                                                                                                                                                                                                            |

SCHOLARONE™  
Manuscripts

# Waterpipe dependence in university students: effect of normative beliefs

---

Salameh P<sup>1</sup>, Salamé J<sup>2</sup>, Waked M<sup>3</sup>, Barbour B<sup>4</sup>, Zeidan N<sup>4</sup>, Baldi I<sup>5</sup>

<sup>1</sup>*Clinical & Epidemiological Research Laboratory, Faculty of Pharmacy, Lebanese University, Hadath, Lebanon*

<sup>2</sup>*Charité – Universitätsmedizin University Hospital, Berlin, Germany*

<sup>3</sup>*Pulmonology department, Saint Georges Hospital & Faculty of Medicine, Balamand University, Beirut, Lebanon*

<sup>4</sup>*Faculty of Public Health, Lebanese University, Fanar, Lebanon*

<sup>5</sup>*Laboratoire Santé Travail Environnement, Université Bordeaux Segalen, Bordeaux, France*

Corresponding author:

Pascale Salameh, PharmD, MPH, PhD

Professor of Epidemiology

Jdeidet El Meten, Chalet Suisse street

Ramza Azzam bldg, 5<sup>th</sup> floor

Beirut, Lebanon

Tel: 009613385542

Fax: 009611696600

E-mail: [psalameh@ul.edu.lb](mailto:psalameh@ul.edu.lb) & [pascalesalameh1@hotmail.com](mailto:pascalesalameh1@hotmail.com)

**Keywords:** waterpipe, smoking, dependence, LWDS-11, YACD, peer pressure, parental guidance, normative belief.

# Waterpipe dependence in university students: effect of normative beliefs

---

## Abstract

**Background:** Waterpipe (WP) smoking is increasing in popularity, particularly in young people; this behavior is highly affected by peers and societal influence, and may induce addictive dependence, a more serious situation. The objective of this study was to quantitatively assess the magnitude of normative beliefs influences on WP dependence among university WP smokers in Lebanon, in comparison with cigarette smokers.

**Methods:** A cross-sectional study was carried out; using a proportionate cluster sample of Lebanese students in the public and private universities. The questionnaire used in this study was composed of several parts, including the socio-demographic part, and a detailed active and passive smoking history, in addition to items of the tobacco dependence scales.

**Results:** Correlates to WP smoking were studying in a private university and ever smoking cigarettes; clear friends' and societal influence were found on smoking behavior and dependence. Although the role of parents was not visible in decreasing the risk of smoking WP, their protective influence seemed more important on WP dependence, a more deleterious behavior. Parents' and friends' disagreement with smoking had a protective effect on cigarette smoking and dependence, while thinking that idols and successful people smoke increased the risk of both cigarette smoking and dependence.

**Conclusion:** Parallel to what should be done in case of cigarette smoking, efforts should be made to decrease fashion related to WP smoking, establish peer education and help parents advising their young offspring about the importance of non smoking WP. Future research is necessary to carry out to further improve our understanding of drivers of WP smoking and dependence.

## Introduction

Waterpipe (WP) smoking is increasing in popularity, particularly among youth of Lebanon [1-4]. WP is thought to contain toxic substances, similar to those contained in cigarette [5-6]. WP has been shown to increase the risk of several diseases, including chronic bronchitis [7], COPD [8], different types of cancer [9], and other ailments [9].

WP has also been demonstrated to contain nicotine, the substance responsible, at least partially, of addictive effects [10; 11]. It has been associated to an identified dependence effect similar to what could be found with cigarette, in addition to a social factor that adds to its potential addictive effect [12]; as expected, WP dependence per se was associated with higher smoking frequency and higher risk of health effects among WP smokers, as compared to non dependent WP smokers [7,8].

The structure of the WP associated dependence concept was shaped by the previous development and validation of a specific score, the Lebanese Waterpipe Dependence Scale-11 (LWDS-11) [13]. In this score, we had found that WP dependence concept could be fit over a 4 factors structure in adults: nicotine physiological dependence, positive reinforcement, negative reinforcement, and psychological craving [13]. The positive reinforcement factor included items of “smoking to please others” and “smoking for pleasure”, two items shown to have a high importance in late adolescence and young adulthood [14]. In fact, the main motives for WP smoking are declared to be socializing, relaxation, pleasure and entertainment; this was suggested in a systematic review with qualitative data synthesis of numerous studies. Peer pressure, fashion, and curiosity were additional motives declared by university students, while expression of cultural identity seemed an additional motive for people in the Middle East [15].

Among young cigarette smokers, students’ perceptions of smoking among the successful/elite and disapproval by parents/peers were independently associated with susceptibility to smoking [16]. In parallel, some epidemiological studies were conducted to evaluate these effects in case

1  
2  
3 of WP smoking, and showed that parents' tolerance of WP smoking, peer WP smoking and the  
4 idea of popularity were main drivers of this behavior [17-19].  
5  
6

7  
8 For cigarette dependence, earlier onset of monthly cigarette smoking, heavier overall  
9 consumption and peers' smoking were associated with higher nicotine dependence in Saudi  
10 young students [20]. Moreover, parental smoking restrictions may have the potential to impede  
11 adolescent progression to adult smoking behavior by reducing smoking rates and  
12 nicotine dependence [21]. No studies have been conducted to our knowledge regarding WP  
13 dependence.  
14  
15  
16  
17  
18  
19

20  
21 Thus, although we may know what drives WP smoking in youngsters, no studies have ever  
22 quantitatively assessed the magnitude of normative beliefs influences among university  
23 smokers on WP dependence, a more health deleterious behavior; the objective of this study  
24 was to evaluate such effect in Lebanon, in comparison with cigarette smokers' dependence.  
25  
26  
27  
28  
29  
30  
31  
32  
33  
34  
35  
36  
37  
38  
39  
40  
41  
42  
43  
44  
45  
46  
47  
48  
49  
50  
51  
52  
53  
54  
55  
56  
57  
58  
59  
60

## Methods

### Population and sampling

A cross-sectional study was carried out; using a proportionate cluster sample of Lebanese students in the public and private universities. A list of universities in Lebanon, provided by the Center for Pedagogic Researches, was used to adjust the sample size [22]. A sample size of at least 3000 individuals was targeted to allow for adequate power for bivariate and multivariate analysis to be carried out.

Most universities' administrative offices in Lebanon that we approached did not allow drawing a random sample of their enrolled students to participate in the study: they did not provide us with the lists of students and permission was not granted to enter classrooms and search for students nominatively. Thus our research group had to work with a nonrandom sample of students outside their classes. Students were approached on campus during break times between courses by a field worker.

The latter explained the study objectives to the student; and after obtaining oral consent, the student was handed the anonymous and self-administered questionnaire. On average, the questionnaire was completed by participants within approximately 20 minutes. At the end of the process, the completed questionnaires were placed in closed boxes and sent for data entry. During the data collection process, the anonymity of the students was guaranteed, to allow for lower information bias. Out of 4900 distributed questionnaires, 3384 (69.1%) were returned to the field worker. Further methodological details are presented in more details elsewhere [3].

### Questionnaires

The questionnaire used in this study was composed of several parts, including the socio-demographic part, and a detailed active and passive smoking history, in addition to items of the tobacco dependence questions: for cigarette dependence, we assessed the Young Adults Cigarette Dependence (YACD) scale [23], and for waterpipe dependence, the LWDS-11 [8], both of which were developed by our team for the Lebanese population. The YACD was developed

1  
2  
3 for university students; it is composed of sixteen items, loading over six factors: nicotine  
4 dependence, craving intensity; positive reinforcement and negative reinforcement [23].  
5  
6 Moreover, since the LWDS-11 was developed for adults, its validity and reliability were  
7 confirmed in this young adults' sample before use.  
8  
9

10  
11  
12 Moreover, normative beliefs questions were taken from a study performed on cigarette  
13 smokers by Primack and collaborators: measures of students' perceptions of smoking among  
14 successful people, cool people and idols, and disapproval by parents and peers were evaluated  
15 by Likert scale questions [24].  
16  
17  
18  
19

### 20 21 **Statistical analysis**

22 Data entry was performed by independent lay persons that were unaware of the objectives of  
23 the study. Statistical analysis was performed using SPSS software, version 13.0. A p-value of  
24 0.05 was considered significant. Cluster sampling effect was taken into account according to  
25 Rumeau-Roquette and collaborators [24]. Data weighting was performed according to the  
26 Center for Educational Research and Development – Lebanese Ministry of Education [22].  
27  
28  
29  
30  
31  
32

33  
34 To confirm the LWDS-11 validity and reliability in the study sample, an exploratory factor  
35 analysis was first performed with its items, after ensuring sample adequacy with the Kaiser-  
36 Meyer-Olkin (KMO) index, and Bartlett's Chi square test of sphericity. Factors were extracted  
37 using the principal component analysis. Items were retained if they loaded 0.3 or more on  
38 factors. Since factors were found to be correlated, we chose to perform a promax rotation with  
39 Kaiser normalization. Afterwards, reliability analysis was performed by Chronbach's alpha  
40 values for factors and the total scale.  
41  
42  
43  
44  
45  
46  
47  
48

49 Comparison of means was performed using ANOVA in bivariate analysis, with Bonferoni  
50 correction on post-hoc tests. To decrease confounding bias, we performed multivariate  
51 analyses: multiple regressions were carried out using a stepwise backward method, after  
52 ensuring sample adequacy, linearity of the model, residual normality, and non collinearity of  
53 retained items (Variance Inflation Factor < 2). We took WP dependence and cigarette  
54  
55  
56  
57  
58  
59  
60

1  
2  
3 dependence as dependent variables in respective models, using socio-demographic  
4 characteristics, other forms of smoking and normative beliefs as independent variables. A p-  
5 value <0.05 was considered significant; missing data was not replaced for this analysis due to  
6 their low percentage (<10%).  
7  
8  
9

10  
11  
12 For indicative purposes, we also conducted multiple logistic regressions, using current  
13 waterpipe and cigarette smoking as respective dependent variables, and socio-demographic  
14 characteristics, other forms of smoking and normative beliefs as independent variables. After  
15 ensuring non colinearity and sampling adequacy by Hosmer-Lemeshow test, we reported  
16 adjusted odds ratios (aOR).  
17  
18  
19  
20  
21  
22  
23  
24  
25  
26  
27  
28  
29  
30  
31  
32  
33  
34  
35  
36  
37  
38  
39  
40  
41  
42  
43  
44  
45  
46  
47  
48  
49  
50  
51  
52  
53  
54  
55  
56  
57  
58  
59  
60



## Results

Among 3384 university students, 779 (23%) reported they were current WP smokers, and 649(19.2%) that they were current cigarette smokers. Among WP smokers, 760 (97.6%) answered to all questions of the LWDS-11 scale. Among cigarette smokers, 595 (91.7%) answered to all questions of the YACD scale.

### Description of the current WP and cigarettes smokers' subsamples

Among WP smokers (n=779), the mean number of waterpipes smoked per week was 4.12 (SD=4.76), while the mean duration of smoking was 6.96 years (SD=2.33). The mean age of the first waterpipe intake was 16.46 years (SD=2.43). Among WP smokers, 35% declared having the intention to stop smoking later, and 20% declared wanting to stop smoking immediately. Moreover, 28.7% ever tried to stop smoking but did not succeed. LWDS mean was 10.23, its median was 9, and standard deviation 6.03. The minimum was zero and maximum 30. Its distribution was almost normal, with a skewness of 0.1.

Among cigarette smokers (n=649), the mean number of cigarettes smoked per day was 17.23 (SD=9.3), while the mean duration of smoking was 4.32 years (SD=2.25). The mean age of the first cigarette intake was 15.89 years (SD=2.35). Among cigarette smokers, 43.2% declared having the intention to stop smoking later, and 27.2% declared wanting to stop smoking immediately. Moreover, 48.7% ever tried to stop smoking but did not succeed. YACD mean was 13.92, its median was 14.04, and standard deviation 5.95. The minimum was 2.5 and maximum 29. Its distribution was almost normal, with a skewness of 0.6.

We note that 234(6.9% of the total students sample) were currently dual smokers of both cigarettes and WP. They constituted 36.4% of cigarette smokers and 30% of current WP smokers.

### **Validity and reliability of the LWDS-11 in Lebanese university students**

The Kaiser-Meyer-Olkin Measure of sampling adequacy was 0.79 ( $p < 0.001$ ). All communalities were higher than 0.35, and the extracted principal component sums of squared loadings explained 66.58% of the total variance.

The Promax rotation with Kaiser normalization gave a four factors solution with the following pattern (Table 1): factor 1 (physiological dependence; 33.14% of the variance explained), factor 2 (psychological craving; 13.08% of the variance explained), factor 3 (negative reinforcement; 11.59% of the variance explained) and factor 4 (positive reinforcement; 8.78% of the variance explained). Reliability measured by Cronbach's alpha for the total score was 0.770. We note that the structure is highly similar to the one found in adults, with one difference: the income item which originally loaded on physiological dependence, now loaded on psychological craving. For the rest of psychometric properties, the scale gave almost identical results. Factors were correlated with each others: factor 1 correlated with factors 2 ( $r_{12}=0.42$ ), 3 ( $r_{13}=0.39$ ) and 4 ( $r_{14}=0.09$ ), factor 2 correlated with factors 3 ( $r_{23}=0.40$ ) and 4 ( $r_{24}=0.02$ ), and factor 3 correlated with factor 4 ( $r_{34}=0.14$ ).

### **Waterpipe and cigarette dependence variation with socio-demographic characteristics**

Waterpipe dependence was significantly higher in widow or divorced individuals ( $p=0.006$ ), and among individuals who have higher numbers of smokers at home ( $p < 0.001$ ) (table 2). However, cigarette dependence was higher in males ( $p=0.006$ ), lower socioeconomic status individuals ( $p=0.051$ ), the 20-21 years age class ( $p < 0.001$ ), the public university ( $p=0.005$ ), and among individuals who have higher numbers of smokers at home ( $p < 0.001$ ); it was also lower in South Lebanon versus other regions ( $p < 0.001$ ) (table 2).

### **Normative beliefs influence on waterpipe and cigarette dependence**

Waterpipe dependence was higher in case individuals believe that successful people smoke ( $p < 0.001$ ), rich people smoke ( $p=0.002$ ), their idols smoke ( $p=0.03$ ); it was lower in case individuals knew it was important for their parents, their friends and people of their age that

1  
2  
3 they do not smoke ( $p<0.01$ ) (table 3). Nearly similar results were found for cigarette  
4 dependence, except for an additional significant higher dependence in case individuals believed  
5 that cool people smoked ( $p=0.002$ ), and a lower trend for significant for the peers' opinion  
6 about smoking ( $p=0.088$ ) (table 3).  
7  
8  
9

### 10 11 12 **Multivariate analysis of WP and cigarette current smoking**

13 Studying in a private university and ever smoking cigarettes were correlated to current  
14 waterpipe smoking; moreover, thinking that successful and cool people smoke increased the  
15 odds of being a current waterpipe smoker, while having friends who disagree with smoking was  
16 correlated with lower waterpipe smoking (table 4). On another hand, being of male sex, not  
17 single, higher age, residing in Mount or North Lebanon, studying in a private university, and  
18 ever smoking waterpipes increase the odds of being a current cigarette smoker; thinking that  
19 successful people or idols smoke was correlated to increased cigarette smoking probability,  
20 while having parents who disagree with smoking was correlated with lower cigarette smoking  
21 (table 4).  
22  
23  
24  
25  
26  
27  
28  
29  
30  
31  
32

### 33 **Multivariate analysis of WP and cigarette dependence**

34 In multiple regression of WP dependence, parents and friends' opinion against smoking were  
35 inversely associated while belief that idols smoke were positively associated with WP  
36 dependence; moreover, higher age class was also associated with higher WP dependence  
37 (Table 4). For cigarette dependence, parents' opinion against smoking was strongly and  
38 inversely associated, while the perception that idols, rich and successful people smoked were  
39 positively associated with cigarette dependence (Table 4). We note that performing the analysis  
40 on dual smokers gave similar results of dependence correlates for both WP and cigarettes,  
41 except for a visible association of dual dependence ( $OR=5.10[2.83; 9.19]$ ;  $p<0.001$ ) (other  
42 results not shown).  
43  
44  
45  
46  
47  
48  
49  
50  
51  
52  
53  
54  
55  
56  
57  
58  
59  
60

## Discussion

The LWDS-11 was of adequate validity and reliability in university students of Lebanon; the structure was highly similar to the one found in adults [13], with one difference: the income item which originally loaded on physiological dependence in adults, now loaded on psychological craving. One explanation could be that many adults adapt their smoking frequency and agree to pay portions of their incomes according to physiological nicotine needs, while younger university students would be ready to pay higher portions of their incomes only in case of extreme psychological craving. Access to money being more limited for university students than among adults may clarify this issue; in parallel, it is worth noting that in the YACD, the money item had also loaded on the psychological craving factor, not on the nicotine dependence factor [23]. Additional studies would be necessary to confirm this finding; nevertheless, the LWDS-11 demonstrated adequate validity and reliability, and could thus be used for the current study.

For WP current smoking, correlates of this behavior were studying in a private university (representing access to money), ever smoking cigarettes, and clear friends' and societal influence, as found in other studies [17-19; 25]. Moreover, friends' disagreement with smoking decreased WP dependence: in the latter case, smoking for conviviality during social gatherings is absent, and this component of positive reinforcement and cue for smoking in many individuals would be expected to affect individuals' dependence to WP [13]. Idols' smoking of university students increased the risk of WP dependence, which may also be considered the reverse side of the medal of the societal influence.

Age increased the risk of WP dependence; this may be explained by the establishment of this habit with time during life in university and more frequent exposure, or due to its possible insidious nature of dependence that may only appear after repeated exposures. The nature of WP dependence installation may differ from cigarette dependence that seems to install in young people after only a few cigarettes [26-28]. Indeed, Asfar et al have shown the existence

1  
2  
3 of beginners and established WP smokers, the latter being less willing to quit WP smoking and  
4 more hooked on the habit [29].  
5  
6  
7

8  
9 Although the role of parents was not visible in decreasing the risk of smoking WP, their  
10 protective influence seemed more important on WP dependence, a more deleterious behavior.  
11 A social tolerance of WP smoking by parents may explain this finding [17], who may intervene  
12 with their offspring in case of dependence only; additional studies are necessary to evaluate  
13 whether parents are able to differentiate between occasional WP smokers and dependent WP  
14 smokers among their children.  
15  
16  
17  
18  
19

20  
21  
22 As for cigarette smoking, numerous socio-demographic factors were found to correlate with  
23 the behavior: male sex, high age, married/widow/divorced marital status, residing in Mount  
24 and North Lebanon, studying in a private university and ever smoking waterpipes. Parents'  
25 disagreement with smoking had a protective effect on cigarette smoking and dependence,  
26 while thinking that idols and successful people smoke increased the risk of both cigarette  
27 smoking and dependence, similarly to other researchers' findings [16; 30]. Friends influence  
28 was also visible, as with other studies [16; 30-31].  
29  
30  
31  
32  
33  
34  
35

36  
37 The idea of dual smoking deserves to be noted: smoking one kind of tobacco is associated with  
38 higher odds of smoking the other, and being dependent to one kind of tobacco increases the  
39 risk of dependence to other kinds. Similar results were found in British university students,  
40 where cigarette smoking was a major driver of waterpipe smoking [32] and in US students,  
41 where the majority of WP smokers were also cigarette smokers [33]. The fact that dependence  
42 to cigarettes and to waterpipe includes nicotine dependence components clearly explains this  
43 finding [11; 34-35]. This may also biologically be confirmed with results found by Rastam and  
44 collaborators, where cigarette and WP both decrease nicotine craving symptoms in dual  
45 smokers, and WP may spoil cigarette smoking cessation [36].  
46  
47  
48  
49  
50  
51  
52  
53  
54  
55  
56  
57  
58  
59  
60

### Limitations of the study

Our study, as with any, has its limitations: a selection bias could have been possible since the sample is not a random sample and may not be representative of the young adults and students' population in Lebanon. This non random sampling could lead to an overrepresentation of students who skip classes and may have higher risky behaviours, such as smoking. There could also be a possibility of respondent and information bias, since the results of our study are based on a self-administered questionnaire. Despite the fact that we ensured anonymity and confidentiality of all data that has been collected, respondents may have underreported some of their behaviours that lead to missing values. Furthermore, we have not taken into account all factors that may predict nicotine dependence, since it has been shown that background factors, psychological characteristics and genetic variation in nicotinic cholinergic receptors contribute independently or interactively to smoking initiation and to severity of nicotine dependence in young people [37]. We suggest that further research be carried taking into account these limitations; we also suggest prospective studies to thoroughly evaluate the effect of parents and friends on future smoking behaviours, in addition to qualitative research that can explore the knowledge, attitudes, and values behind these behaviours.

### Conclusion

In conclusion, WP smoking and dependence are influenced by parents' and friends' opinions, and idols' smoking status. Efforts should be made to establish peer education and help parents advising their young offspring about the importance of non smoking. Future research is necessary to carry out to further improve our understanding of drivers of WP smoking and dependence.

## What this study adds

- This is the first study exploring normative beliefs effect on waterpipe smoking in university students
- Although the role of parents was not visible in decreasing WP smoking WP, their protective influence decreased WP dependence, a deleterious behavior.
- We found out that efforts should be made to establish peer education and help parents advising their young offspring about the importance of non smoking WP.

## Contributorship

All authors:

- Contributed to the study design and helped in data collection
- Contributed to the results' analysis reviewing
- Contributed to the manuscript reviewing

## Funding

This project was funded by the Lebanese-French cooperation program CEDRE; this program had no interventional role in the study design, data collection, analysis or manuscript writing.

## References

- 1- Chaaya M, El-Roueiheb Z, Chemaitelly H, Azar G, Nasr J, Al-Sahab B. Argileh smoking among university students: a new tobacco epidemic. *Nicotine Tob Res.* 2004; 6(3):457-63.
- 2- Waked M, Salameh P, Aoun Z. Water-pipe (Narguile) Smokers in Lebanon: A pilot study. *Eastern Mediterranean Health Journal* 2009; 15(2); 432-42.
- 3- Salameh P, Jomaa L, Issa C, Farhat G, Zeghondi H, Gerges N, Sabbagh MT, Chaaya M, Barbour B, Waked M, Salamé J, Zeidan N, Baldi I: The Lebanese National Conference for Health in University (LNCHU) study group. Assessment of health risk behaviours among university students: a cross-sectional study in Lebanon. *International Journal of Adolescence and Youth* 2012a; 1-14. Available at: <http://dx.doi.org/10.1080/02673843.2012.733313>
- 4- El-Roueiheb Z, Tamim H, Kanj M, Jabbour S, Alayan I, Musharrafieh U. Cigarette and waterpipe smoking among Lebanese adolescents, a cross-sectional study, 2003-2004. *Nicotine Tob Res.* 2008;10(2):309-14.
- 5- Cobb CO, Shihadeh A, Weaver MF, Eissenberg T. Waterpipe tobacco smoking and cigarette smoking: a direct comparison of toxicant exposure and subjective effects. *Nicotine Tob Res.* 2011; 13(2):78-87.
- 6- Eissenberg T, Shihadeh A. Waterpipe tobacco and cigarette smoking: direct comparison of toxicant exposure. *Am J Prev Med.* 2009; 37(6):518-23.
- 7- Salameh P, Waked M, Khayat G, Khoury F, Akiki Z, Nasser Z, Abou Abbass L, Azizi S, Saadeh D, Akhdar A, Ziadeh C, Salame J, Dramaix M. Waterpipe smoking and dependence are associated with chronic bronchitis: a case control study. *Eastern Mediterranean Health Journal* 2012b; 18(10): 996-1004.
- 8- Salameh P, Khayat G, Waked M, Dramaix M. Waterpipe smoking and dependence are associated with Chronic Obstructive Pulmonary Disease: a case-control study. *The Open Epidemiology Journal*, 2012c; 5: 36-44.
- 9- Akl EA, Gaddam S, Gunukula SK, Honeine R, Jaoude PA, Irani J. The effects of waterpipe tobacco smoking on health outcomes: a systematic review. *Int J Epidemiol.* 2010;39(3):834-57.
- 10- Aoun Z, Salameh P, Waked M. Saliva cotinine and exhaled carbon monoxide in real life waterpipe smokers. *Inhalation Toxicology* 2007; 19(9):771-7.
- 11- Salameh P, Aoun Z, Waked M. Saliva cotinine and exhaled carbon monoxide in real life narghile (waterpipe) smokers: a post hoc analysis. *Tobacco Use Insights* 2009 (2): 1-10.
- 12- Hammal F, Mock J, Ward KD, Eissenberg T, Maziak W. A pleasure among friends: how narghile (waterpipe) smoking differs from cigarette smoking in Syria. *Tob Control.* 2008;17(2):e3.
- 13- Salameh P, Waked M, Aoun Z. Narguileh smoking: Construction and validation of the LWDS-11 dependence scale. *Nicotine & Tobacco Research* 2008; 10(1): 148-59.
- 14- Harakeh Z, Vollebergh WA. The impact of active and passive peer influence on young adult smoking: an experimental study. *Drug Alcohol Depend.* 2012; 121(3):220-3. doi: 10.1016/j.drugalcdep.2011.08.029.
- 15- Akl EA, Jawad M, Lam WY, Co CN, Obeid R, Irani J. Motives, beliefs and attitudes towards waterpipe tobacco smoking: a systematic review. *Harm Reduct J.* 2013; 10(1):12. doi: 10.1186/1477-7517-10-12.
- 16- Primack B, Switzer G, Dalton M. Improving Measurement of Normative Beliefs Involving Smoking Among Adolescents. *Arch Pediatr Adolesc Med.* 2007; 161:434-439



- 1  
2  
3 17-Sabahy AR, Divsalar K, Bahreinifar S, Marzban M, Nakhaee N. Waterpipe tobacco use among Iranian university  
4 students: correlates and perceived reasons for use. *Int J Tuberc Lung Dis*. 2011;15(6):844-7.  
5  
6 18-Roohafza H, Sadeghi M, Shahnam M, Bahonar A, Sarafzadegan N. Perceived factors related to cigarette  
7 and waterpipe (ghelyan) initiation and maintenance in university students of Iran. *Int J Public Health*. 2011;  
8 56(2):175-80.  
9  
10 19-Amin TT, Amr MA, Zaza BO, Suleman W. Harm perception, attitudes and predictors of waterpipe (shisha)  
11 smoking among secondary school adolescents in Al-Hassa, Saudi Arabia. *Asian Pac J Cancer Prev*. 2010;11(2):293-  
12 301.  
13  
14 20-Guo HJ, McGee R, Reeder T, Gray A. Smoking behaviours and contextual influences on adolescent nicotine  
15 dependence. *Aust N Z J Public Health*. 2010; 34(5):502-7.  
16  
17 21-Ditre JW, Coraggio JT, Herzog TA. Associations between parental smoking restrictions and adolescent smoking.  
18 *Nicotine Tob Res*. 2008;10(6):975-83.  
19  
20 22-Center for Educational research and Development, Beirut, Lebanon. [List of Universities in Lebanon]. Available  
21 on: <http://www.crdp.org/CRDP>  
22  
23 23-Salameh P, Jomaa L, Farhat G, Zeghondi H, Gerges N, Issa C, Sabbagh MT, Chaaya M, Barbour B, Waked M,  
24 Salamé J, Saadallah-Zeidan N, Baldi I. The Lebanese National Conference for Health in Universities study group. The  
25 Young Adults' Cigarette Dependence (YACD) Score: An improved tool for cigarette dependence assessment in  
26 university students. *Addictive Behaviors*, 2013; 38(5): 2174-9.  
27  
28 24-Rumeau-Rouquette, C., Breart, G., Padiou, R. (1985). Méthodes en Epidémiologie: Echantillonnage,  
29 investigations, analyse (pp. 71-82). Paris, Flammarion Editions. No DOI available.  
30  
31 25-Al-Lawati JA, Muula AS, Hilmi SA, Rudatsikira E. Prevalence and Determinants of Waterpipe Tobacco Use among  
32 Adolescents in Oman. *Sultan Qaboos Univ Med J*. 2008; 8(1):37-43.  
33  
34 26-DiFranza JR, Rigotti NA, McNeill AD, Ockene JK, Savageau JA, St Cyr D, Coleman M. Initial symptoms of nicotine  
35 dependence in adolescents. *Tob Control*. 2000; 9(3):313-9.  
36  
37 27-Scragg R, Wellman RJ, Laugesen M, DiFranza JR. Diminished autonomy over tobacco can appear with the first  
38 cigarettes. *Addict Behav*. 2008; 33(5):689-98.  
39  
40 28-Ursprung WW, DiFranza JR. The loss of autonomy over smoking in relation to lifetime cigarette consumption.  
41 *Addict Behav*. 2010;35(1):14-8.  
42  
43 29-Asfar T, Ward KD, Eissenberg T, Maziak W. Comparison of patterns of use, beliefs, and attitudes related  
44 to waterpipe between beginning and established smokers. *BMC Public Health*. 2005; 5:19.  
45  
46 30-Odukoya OO, Odeyemi KA, Oyeyemi AS, Upadhyay RP. Determinants of smoking initiation and susceptibility to  
47 future smoking among school-going adolescents in Lagos State, Nigeria. *Asian Pac J Cancer Prev*. 2013; 14(3):1747-  
48 53.  
49  
50 31-Liao Y, Huang Z, Huh J, Pentz MA, Chou CP. Changes in friends' and parental influences on  
51 cigarette smoking from early through late adolescence. *J Adolesc Health*. 2013; 53(1):132-8.  
52  
53 32-Jackson D, Aveyard P. Waterpipe smoking in students: prevalence, risk factors, symptoms of addiction, and  
54 smoke intake. Evidence from one British university. *BMC Public Health*. 2008; 8:174.  
55  
56  
57  
58  
59  
60

1  
2  
3 33-Ward KD, Eissenberg T, Gray JN, Srinivas V, Wilson N, Maziak W. Characteristics of U.S. waterpipe users: a  
4 preliminary report. *Nicotine Tob Res.* 2007;9(12):1339-46.  
5

6 34-Hudmon, K.S., Marks, J.L., Pomerleau, C.S., Bolt, D.M., Brigham, J., Swan, G.E. A multidimensional model for  
7 characterizing tobacco dependence. *Nicotine & Tobacco Research* 2003 ; 5:655–64.  
8

9 35-Heatheron, T.F., Kozlowski, L.T., Frecker, R.C., Fagerström, K.O. The Fagerström Test for Nicotine Dependence:  
10 a revision of the Fagerström Tolerance Questionnaire. *British Journal of Addiction* 1991 ; 86(9): 1119-27. No DOI  
11 available.  
12

13 36-Rastam S, Eissenberg T, Ibrahim I, Ward KD, Khalil R, Maziak W. Comparative analysis of waterpipe and  
14 cigarette suppression of abstinence and craving symptoms. *Addict Behav.* 2011; 36(5): 555–559  
15

16 37-Greenbaum L, Kanyas K, Karni O, Merbl Y, Olender T, Horowitz A, Yakir A, Lancet D, Ben-Asher E, Lerer B. Why  
17 do young women smoke? I. Direct and interactive effects of environment, psychological characteristics and  
18 nicotinic cholinergic receptor genes. *Mol Psychiatry.* 2006; 11(3):312-22, 223.  
19  
20  
21  
22  
23  
24  
25  
26  
27  
28  
29  
30  
31  
32  
33  
34  
35  
36  
37  
38  
39  
40  
41  
42  
43  
44  
45  
46  
47  
48  
49  
50  
51  
52  
53  
54  
55  
56  
57  
58  
59  
60

**Table 1 – Validity and reliability of the LWDS-11 among university students of Lebanon**

| Items                                                                  | Factor 1<br>Physiological<br>dependence | Factor 2<br>Psychological<br>craving | Factor 3<br>Negative<br>reinforcement | Factor 4<br>Positive<br>reinforcement |
|------------------------------------------------------------------------|-----------------------------------------|--------------------------------------|---------------------------------------|---------------------------------------|
| How many times were you able to stay 7 days without smoking waterpipe? | 0.877                                   |                                      |                                       |                                       |
| How many days could you stay without smoking waterpipe?                | 0.871                                   |                                      |                                       |                                       |
| Number of smoked waterpipes per week?                                  | 0.798                                   |                                      |                                       |                                       |
| Would you smoke waterpipe even if you are ill/ bedridden?              |                                         | 0.836                                |                                       |                                       |
| Are you ready not to eat in exchange for a waterpipe?                  |                                         | 0.827                                |                                       |                                       |
| Would you smoke waterpipe alone?                                       |                                         | 0.547                                |                                       |                                       |
| How much of your income are you ready to pay for waterpipe smoking?    |                                         | 0.426                                |                                       |                                       |
| Smokes waterpipe to relax his nerves                                   |                                         |                                      | 0.868                                 |                                       |
| Smokes waterpipe to improve his morale                                 |                                         |                                      | 0.862                                 |                                       |
| Smokes waterpipe to please others (conviviality)                       |                                         |                                      |                                       | 0.910                                 |
| Smokes waterpipe for pleasure                                          |                                         |                                      |                                       | 0.573                                 |
| Cronbach's alpha reliability measure                                   | 0.806                                   | 0.659                                | 0.671                                 | 0.527                                 |

**Table 2 –LWDS-11 and YACD means in different socio-demographic categories of smokers**

| Characteristic                  | LWDS-11 Mean (SD) | p-value | YACD (SD)   | p-value |
|---------------------------------|-------------------|---------|-------------|---------|
| Sex                             |                   | 0.082   |             | 0.006   |
| Male                            | 10.62(6.21)       |         | 14.22(5.95) |         |
| Female                          | 9.86(5.84)        |         | 12.70(5.98) |         |
| Marital status                  |                   | 0.006*  |             | 0.664   |
| Married                         | 10.00 (4.85)      |         | 14.76(7.65) |         |
| Single                          | 10.19(6.02)       |         | 13.84(5.99) |         |
| Widow or divorced               | 17.50 (6.17)      |         | 11.5(0.00)  |         |
| Socio-economic status quartiles |                   | 0.35    |             | 0.051   |
| Quartile 1                      | 9.69(5.51)        |         | 15.61(6.09) |         |
| Quartile 2                      | 10.67(5.78)       |         | 14.11(6.11) |         |
| Quartile 3                      | 9.68(6.04)        |         | 13.51(5.65) |         |
| Quartile 4                      | 10.47(6.90)       |         | 13.70(5.95) |         |
| Age classes                     |                   | 0.053** |             | <0.001* |
| 17-19 years                     | 9.42(5.86)        |         | 11.69(5.37) |         |
| 20-21 years                     | 10.75(5.88)       |         | 14.93(5.90) |         |
| 22 years and more               | 10.14(6.36)       |         | 13.27(6.07) |         |
| Private university              | 10.21(6.03)       | 0.422   | 13.33(5.88) | 0.005   |
| Public university               | 9.86(6.07)        |         | 14.77(6.09) |         |
| Region                          |                   | 0.135   |             | <0.001† |
| Beyrouth                        | 10.72(6.62)       |         | 13.21(5.99) |         |
| Mount Lebanon                   | 9.55(6.03)        |         | 14.05(5.89) |         |
| North Lebanon                   | 10.91(4.87)       |         | 15.47(6.43) |         |
| South Lebanon                   | 10.55(6.21)       |         | 9.99(3.47)  |         |
| Bekaa plain                     | 9.95(6.07)        |         | 12.28(6.31) |         |
| Number of smokers at home       |                   | <0.001* |             | <0.001‡ |
| No smokers                      | 9.00(5.51)        |         | 11.98(5.19) |         |
| One smoker                      | 8.87 (5.65)       |         | 11.68(5.44) |         |
| Two smokers                     | 10.21(5.75)       |         | 12.46(5.45) |         |
| Three and more                  | 12.28(6.42)       |         | 16.21(5.92) |         |

\*All two by two differences were significant; \*\* Difference significant between the first two categories; # Difference between first and third categories was significant; ‡Difference significant between third category and others is significant; †South Lebanon significantly different from other regions

**Table 3 – LWDS-11 means bivariate analysis with societal influence**

| Characteristic                                     | LWDS-11<br>Mean (SD) | p-value      | YACD<br>Mean (SD) | p-value |
|----------------------------------------------------|----------------------|--------------|-------------------|---------|
| Successful people smoke                            |                      | <0.001*      |                   | <0.001¶ |
| Yes                                                | 9.93(5.80)           |              | 12.81(5.91)       |         |
| Maybe                                              | 9.61(5.61)           |              | 12.50(5.39)       |         |
| No                                                 | 11.92(6.90)          |              | 16.43(5.66)       |         |
| Cool people smoke                                  |                      | 0.163        |                   | 0.002#  |
| No                                                 | 9.93(6.30)           |              | 12.79(5.91)       |         |
| Maybe                                              | 9.91(5.99)           |              | 13.88(5.95)       |         |
| Yes                                                | 10.79(5.91)          |              | 14.76(5.94)       |         |
| Rich people smoke                                  |                      | 0.002*       |                   | <0.001¶ |
| No                                                 | 10.04(6.21)          |              | 12.71(5.89)       |         |
| Maybe                                              | 9.55(5.60)           |              | 13.72(5.89)       |         |
| Yes                                                | 11.79(5.86)          |              | 16.69(5.35)       |         |
| My idols smoke                                     |                      | 0.030#       |                   | <0.001¶ |
| No                                                 | 10.03(6.09)          |              | 12.49(5.78)       |         |
| Maybe                                              | 9.90(5.69)           |              | 12.86(5.96)       |         |
| Yes                                                | 11.43(6.58)          |              | 16.77(5.65)       |         |
| For my parents, it is important not to smoke       |                      | <0.001*      |                   | <0.001¶ |
| No                                                 | 13.25(6.88)          |              | 16.99(5.24)       |         |
| Maybe                                              | 10.28(6.17)          |              | 16.18(5.51)       |         |
| Yes                                                | 9.78(5.78)           |              | 12.57(5.77)       |         |
| For my friends, it is important not to smoke       |                      | <0.001*<br>* |                   | <0.001‡ |
| No                                                 | 12.22(6.50)          |              | 15.49(5.79)       |         |
| Maybe                                              | 10.00(5.65)          |              | 13.26(5.52)       |         |
| Yes                                                | 9.34(5.81)           |              | 13.05(6.19)       |         |
| For people of my age, it is important not to smoke |                      | 0.009*       |                   | 0.088   |
| No                                                 | 11.33(6.31)          |              | 14.53(6.04)       |         |
| Maybe                                              | 9.37(5.69)           |              | 13.45(5.70)       |         |
| Yes                                                | 9.79(6.03)           |              | 13.39(6.06)       |         |

\*All two by two differences were significant; \*\* Difference significant between the first two categories; #

Difference between first and third categories was significant; ¶Difference was not significant between categories

1 & 2; ‡Difference was not significant between categories 2 & 3

Table 4 – Multivariate analysis tobacco use and dependence

| <b>Binomial dependent variable</b>            | <b>Independent variables</b>               | <b>Adjusted OR</b>                       | <b>[95% of CI]</b>                   | <b>p-value</b> |
|-----------------------------------------------|--------------------------------------------|------------------------------------------|--------------------------------------|----------------|
| Current waterpipe smoking <sup>†,‡</sup>      | Studying in a private university           | 1.33                                     | [1.10;1.61]                          | 0.004          |
|                                               | Successful people smoke                    | 1.45                                     | [1.27;1.66]                          | <0.001         |
|                                               | Cool people smoke                          | 1.24                                     | [1.10;1.39]                          | <0.001         |
|                                               | Friends think it is important not to smoke | 0.73                                     | [0.63;0.84]                          | <0.001         |
|                                               | Ever smoking cigarettes                    | 2.04                                     | [1.61;2.60]                          | <0.001         |
| Current cigarette smoking <sup>†,‡</sup>      | Female sex                                 | 0.24                                     | [0.19;0.29]                          | <0.001         |
|                                               | Other than single marital status           | 2.63                                     | [1.20;5.76]                          | 0.016          |
|                                               | Higher age class                           | 1.37                                     | [1.19;1.57]                          | <0.001         |
|                                               | Mount Lebanon versus Beirut                | 1.37                                     | [1.03;1.82]                          | 0.029          |
|                                               | North Lebanon versus Beirut                | 1.46                                     | [1.00;2.13]                          | 0.053          |
|                                               | South Lebanon versus Beirut                | 0.48                                     | [0.30;0.78]                          | 0.003          |
|                                               | Bekaa plain versus Beirut                  | 0.61                                     | [0.36;1.02]                          | 0.057          |
|                                               | Studying in a private university           | 1.96                                     | [1.58;2.43]                          | <0.001         |
|                                               | Successful people smoke                    | 1.75                                     | [1.52;2.01]                          | <0.001         |
|                                               | My idols smoke                             | 1.13                                     | [0.99;1.30]                          | 0.074          |
|                                               | Parents think it is important not to smoke | 0.81                                     | [0.70;0.93]                          | 0.002          |
| Ever smoking waterpipes                       | 1.56                                       | [1.22;1.99]                              | <0.001                               |                |
| <b>Continuous dependent variable</b>          | <b>Independent variables</b>               | <b>Adjusted standardized beta values</b> | <b>Adjusted Beta values [95% CI]</b> | <b>p-value</b> |
| LWDS-11 among WP smokers <sup>*,‡</sup>       | Parents think it is important not to smoke | -0.113                                   | -0.98[-1.75;-0.22]                   | 0.012          |
|                                               | Friends think it is important not to smoke | -0.139                                   | -1.04[-1.69;-0.38]                   | 0.002          |
|                                               | My idols smoke                             | 0.106                                    | 0.86[0.22;1.50]                      | 0.008          |
|                                               | Higher age class                           | 0.087                                    | 0.75[0.08;1.41]                      | 0.027          |
| YACD among cigarette smokers <sup>**</sup> ,‡ | Parents think it is important not to smoke | -0.251                                   | -1.89[-2.51;-1.27]                   | <0.001         |
|                                               | My idols smoke                             | 0.165                                    | 1.19[0.53;1.84]                      | <0.001         |
|                                               | Rich people smoke                          | 0.109                                    | 0.79[0.14;1.45]                      | 0.018          |
|                                               | Successful people smoke                    | 0.104                                    | 0.71[0.09;1.33]                      | 0.025          |

<sup>†</sup>Performed on whole university students sample; Conditions for sample adequacy satisfied; stepwise backward model; all other variables were not retained in the model.

<sup>\*</sup>R=0.255; Adjusted R square=0.065; Stepwise model; VIF<2; residuals are normal; all other variables were not retained in the model.

<sup>\*\*</sup>R=0.426; Adjusted R square=0.175; Stepwise model; VIF<2; residual are normal; all other variables were not retained in the model.

<sup>‡</sup>Variables included in all models: sex, marital status, socioeconomic classes, age classes, region of residence, private university (versus public), successful people smoke, cool people smoke, rich people smoke, my idols smoke, parents think it is important not to smoke, friends think it is important not to smoke, people of the same age think it is important not to smoke, smoking other type of tobacco.

## STROBE Statement—checklist of items that should be included in reports of observational studies

|                          | Item No | Recommendation                                                                                                                                                                                                                                                                                                                                                                                                                                                         | Reported on page |
|--------------------------|---------|------------------------------------------------------------------------------------------------------------------------------------------------------------------------------------------------------------------------------------------------------------------------------------------------------------------------------------------------------------------------------------------------------------------------------------------------------------------------|------------------|
| Title and abstract       | 1       | (a) Indicate the study's design with a commonly used term in the title or the abstract                                                                                                                                                                                                                                                                                                                                                                                 | 3                |
|                          |         | (b) Provide in the abstract an informative and balanced summary of what was done and what was found                                                                                                                                                                                                                                                                                                                                                                    | 3                |
| <b>Introduction</b>      |         |                                                                                                                                                                                                                                                                                                                                                                                                                                                                        |                  |
| Background/rationale     | 2       | Explain the scientific background and rationale for the investigation being reported                                                                                                                                                                                                                                                                                                                                                                                   | 4                |
| Objectives               | 3       | State specific objectives, including any prespecified hypotheses                                                                                                                                                                                                                                                                                                                                                                                                       | 5                |
| <b>Methods</b>           |         |                                                                                                                                                                                                                                                                                                                                                                                                                                                                        |                  |
| Study design             | 4       | Present key elements of study design early in the paper                                                                                                                                                                                                                                                                                                                                                                                                                | 6                |
| Setting                  | 5       | Describe the setting, locations, and relevant dates, including periods of recruitment, exposure, follow-up, and data collection                                                                                                                                                                                                                                                                                                                                        | 6                |
| Participants             | 6       | (a) <i>Cohort study</i> —Give the eligibility criteria, and the sources and methods of selection of participants. Describe methods of follow-up<br><i>Case-control study</i> —Give the eligibility criteria, and the sources and methods of case ascertainment and control selection. Give the rationale for the choice of cases and controls<br><i>Cross-sectional study</i> —Give the eligibility criteria, and the sources and methods of selection of participants | 6                |
|                          |         | (b) <i>Cohort study</i> —For matched studies, give matching criteria and number of exposed and unexposed<br><i>Case-control study</i> —For matched studies, give matching criteria and the number of controls per case                                                                                                                                                                                                                                                 | NA               |
| Variables                | 7       | Clearly define all outcomes, exposures, predictors, potential confounders, and effect modifiers. Give diagnostic criteria, if applicable                                                                                                                                                                                                                                                                                                                               | 7-8              |
| Data sources/measurement | 8*      | For each variable of interest, give sources of data and details of methods of assessment (measurement). Describe comparability of assessment methods if there is more than one group                                                                                                                                                                                                                                                                                   | 7-8              |
| Bias                     | 9       | Describe any efforts to address potential sources of bias                                                                                                                                                                                                                                                                                                                                                                                                              | 6-7              |
| Study size               | 10      | Explain how the study size was arrived at                                                                                                                                                                                                                                                                                                                                                                                                                              | 6                |
| Quantitative variables   | 11      | Explain how quantitative variables were handled in the analyses. If applicable, describe which groupings were chosen and why                                                                                                                                                                                                                                                                                                                                           | 7-8              |
| Statistical methods      | 12      | (a) Describe all statistical methods, including those used to control for confounding                                                                                                                                                                                                                                                                                                                                                                                  | 7-8              |
|                          |         | (b) Describe any methods used to examine subgroups and interactions                                                                                                                                                                                                                                                                                                                                                                                                    | NA               |
|                          |         | (c) Explain how missing data were addressed                                                                                                                                                                                                                                                                                                                                                                                                                            | 8                |
|                          |         | (d) <i>Cohort study</i> —If applicable, explain how loss to follow-up was addressed<br><i>Case-control study</i> —If applicable, explain how matching of cases and controls was addressed<br><i>Cross-sectional study</i> —If applicable, describe analytical methods taking account of sampling strategy                                                                                                                                                              | 7                |
|                          |         | (e) Describe any sensitivity analyses                                                                                                                                                                                                                                                                                                                                                                                                                                  | NA               |

| <b>Results</b>           |     |                                                                                                                                                                                                              |       |
|--------------------------|-----|--------------------------------------------------------------------------------------------------------------------------------------------------------------------------------------------------------------|-------|
| Participants             | 13* | (a) Report numbers of individuals at each stage of study—eg numbers potentially eligible, examined for eligibility, confirmed eligible, included in the study, completing follow-up, and analysed            | 9     |
|                          |     | (b) Give reasons for non-participation at each stage                                                                                                                                                         | NA    |
|                          |     | (c) Consider use of a flow diagram                                                                                                                                                                           | NA    |
| Descriptive data         | 14* | (a) Give characteristics of study participants (eg demographic, clinical, social) and information on exposures and potential confounders                                                                     | 9     |
|                          |     | (b) Indicate number of participants with missing data for each variable of interest                                                                                                                          | 9     |
|                          |     | (c) <i>Cohort study</i> —Summarise follow-up time (eg, average and total amount)                                                                                                                             | NA    |
| Outcome data             | 15* | <i>Cohort study</i> —Report numbers of outcome events or summary measures over time                                                                                                                          | NA    |
|                          |     | <i>Case-control study</i> —Report numbers in each exposure category, or summary measures of exposure                                                                                                         | NA    |
|                          |     | <i>Cross-sectional study</i> —Report numbers of outcome events or summary measures                                                                                                                           | 9     |
| Main results             | 16  | (a) Give unadjusted estimates and, if applicable, confounder-adjusted estimates and their precision (eg, 95% confidence interval). Make clear which confounders were adjusted for and why they were included | 10-11 |
|                          |     | (b) Report category boundaries when continuous variables were categorized                                                                                                                                    | NA    |
|                          |     | (c) If relevant, consider translating estimates of relative risk into absolute risk for a meaningful time period                                                                                             | NA    |
| Other analyses           | 17  | Report other analyses done—eg analyses of subgroups and interactions, and sensitivity analyses                                                                                                               | 9-10  |
| <b>Discussion</b>        |     |                                                                                                                                                                                                              |       |
| Key results              | 18  | Summarise key results with reference to study objectives                                                                                                                                                     | 12    |
| Limitations              | 19  | Discuss limitations of the study, taking into account sources of potential bias or imprecision. Discuss both direction and magnitude of any potential bias                                                   | 14    |
| Interpretation           | 20  | Give a cautious overall interpretation of results considering objectives, limitations, multiplicity of analyses, results from similar studies, and other relevant evidence                                   | 12-13 |
| Generalisability         | 21  | Discuss the generalisability (external validity) of the study results                                                                                                                                        | 14    |
| <b>Other information</b> |     |                                                                                                                                                                                                              |       |
| Funding                  | 22  | Give the source of funding and the role of the funders for the present study and, if applicable, for the original study on which the present article is based                                                | 2     |

\*Give information separately for cases and controls in case-control studies and, if applicable, for exposed and unexposed groups in cohort and cross-sectional studies.

**Note:** An Explanation and Elaboration article discusses each checklist item and gives methodological background and published examples of transparent reporting. The STROBE checklist is best used in conjunction with this article (freely available on the Web sites of PLoS Medicine at <http://www.plosmedicine.org/>, Annals of Internal Medicine at <http://www.annals.org/>, and Epidemiology at <http://www.epidem.com/>). Information on the STROBE Initiative is available at [www.strobe-statement.org](http://www.strobe-statement.org).

Von Elm E, Altman DG, Egger M, Pocock SJ, Gøtzsche PC, Vandenbroucke JP; STROBE Initiative. The Strengthening the Reporting of Observational Studies in Epidemiology (STROBE) statement: guidelines for reporting observational studies. *Lancet* 2007; **370**:1453-7





## Waterpipe dependence in university students: effect of normative beliefs

|                                 |                                                                                                                                                                                                                                                                                                                                                                                                            |
|---------------------------------|------------------------------------------------------------------------------------------------------------------------------------------------------------------------------------------------------------------------------------------------------------------------------------------------------------------------------------------------------------------------------------------------------------|
| Journal:                        | <i>BMJ Open</i>                                                                                                                                                                                                                                                                                                                                                                                            |
| Manuscript ID:                  | bmjopen-2013-004378.R1                                                                                                                                                                                                                                                                                                                                                                                     |
| Article Type:                   | Research                                                                                                                                                                                                                                                                                                                                                                                                   |
| Date Submitted by the Author:   | 17-Dec-2013                                                                                                                                                                                                                                                                                                                                                                                                |
| Complete List of Authors:       | Salameh, Pascale; Lebanese University, Clinical and Epidemiological Research Laboratory, Faculty of Pharmacy<br>Salamé, Joseph; Charité – Universitätsmedizin University Hospital, Waked, Mirna; Saint Georges Hospital, Pulmonology<br>Barbour, Bernadette; Lebanese University, Public health<br>Zeidan, Nina; Lebanese University, Public health<br>Baldi, Isabelle; Bordeaux Segalen university, ISPED |
| <b>Primary Subject Heading</b>: | Epidemiology                                                                                                                                                                                                                                                                                                                                                                                               |
| Secondary Subject Heading:      | Epidemiology, Public health, Smoking and tobacco                                                                                                                                                                                                                                                                                                                                                           |
| Keywords:                       | EPIDEMIOLOGY, PUBLIC HEALTH, STATISTICS & RESEARCH METHODS                                                                                                                                                                                                                                                                                                                                                 |
|                                 |                                                                                                                                                                                                                                                                                                                                                                                                            |

SCHOLARONE™  
Manuscripts

# Waterpipe dependence in university students: effect of normative beliefs

---

Salameh P<sup>1</sup>, Salamé J<sup>2</sup>, Waked M<sup>3</sup>, Barbour B<sup>4</sup>, Zeidan N<sup>4</sup>, Baldi I<sup>5</sup>

<sup>1</sup>*Clinical & Epidemiological Research Laboratory, Faculty of Pharmacy, Lebanese University, Hadath, Lebanon*

<sup>2</sup>*Charité – Universitätsmedizin University Hospital, Berlin, Germany*

<sup>3</sup>*Pulmonology department, Saint Georges Hospital & Faculty of Medicine, Balamand University, Beirut, Lebanon*

<sup>4</sup>*Faculty of Public Health, Lebanese University, Fanar, Lebanon*

<sup>5</sup>*Laboratoire Santé Travail Environnement, Université Bordeaux Segalen, Bordeaux, France*

Corresponding author:

Pascale Salameh, PharmD, MPH, PhD

Professor of Epidemiology

Jdeidet El Meten, Chalet Suisse street

Ramza Azzam bldg, 5<sup>th</sup> floor

Beirut, Lebanon

Tel: 009613385542

Fax: 009611696600

E-mail: [psalameh@ul.edu.lb](mailto:psalameh@ul.edu.lb) & [pascalesalameh1@hotmail.com](mailto:pascalesalameh1@hotmail.com)

# Waterpipe dependence in university students: effect of normative beliefs

## Abstract

**Background:** Waterpipe (WP) smoking is increasing in popularity, particularly in young people; this behavior is highly affected by peers and societal influence, and may induce addictive dependence, a more serious situation. The objective of this study was to measure the correlates, including normative beliefs, associated with waterpipe and cigarette prevalence and dependence. **Methods:** A cross-sectional study was carried out; using a proportionate cluster sample of Lebanese students in the public and private universities. The questionnaire used in this study was composed of several parts, including the socio-demographic part, and a detailed active and passive smoking history, in addition to items of the tobacco dependence scales. **Results:** Correlates to WP smoking were studying in a private university and ever smoking cigarettes; clear friends' and societal influence were found on smoking behavior and dependence. Although the role of parents was not visible in decreasing the risk of smoking WP, their protective influence seemed more important on WP dependence, a behavior that is considered more deleterious for health. Parents' and friends' disagreement with smoking had a protective effect on cigarette smoking and dependence, while thinking that idols and successful people smoke increased the risk of both cigarette smoking and dependence. **Conclusion:** In conclusion, WP smoking and dependence are influenced by parents' and friends' opinions, and idols' smoking status; these results suggest the potential possibility of establishing peer education and help parents advising their young offspring about the importance of non smoking WP. Future research is necessary to further improve our understanding of motives for WP smoking and dependence.

**Keywords:** waterpipe, smoking, dependence, LWDS-11, YACD, peer pressure, parental guidance, normative belief.

## Article summary

### Strengths of the study

- This is the epidemiological first study exploring normative beliefs effect on waterpipe smoking in university students
- This is the first study in the region concerning WP dependence in university students
- The study was conducted over a large number of university students in Lebanon
- Anonymity and non traceability of participants increases the possibility of straight answers
- The study showed that parents' opinion did not affect WP smokers, while it had a protective effect against WP dependence.

### Limitations of the study

- The sample was not random, thus a selection bias could not be excluded
- Information bias is also possible, because results were based on self declared answers
- The use of self completed questionnaires may increase the risk of non response to certain items
- We have not taken into account all factors that may predict nicotine dependence
- Qualitative studies could be useful to further explain the results we obtained

## Introduction

Waterpipe (WP) smoking is increasing in popularity, particularly among young people and university students [1-4]. WP is thought to contain toxic substances, similar to those contained in cigarette [5-6]. WP has been shown to increase the risk of several diseases, including chronic bronchitis [7], COPD [8], lung cancer [9], and other ailments [9].

WP has also been demonstrated to contain nicotine, the substance responsible, at least partially, of addictive effects [10; 11]. It has been associated to an identified dependence effect similar to what could be found with cigarette, in addition to a social factor that adds to its potential addictive effect [12]; as expected, WP dependence per se was associated with higher smoking frequency and higher risk of health effects among WP smokers, as compared to non dependent WP smokers [7,8].

The structure of the WP associated dependence concept was shaped by the previous development and validation of a specific score, the Lebanese Waterpipe Dependence Scale-11 (LWDS-11) [13]. The score included items of “smoking to please others” and “smoking for pleasure”, two items shown to have a high importance in late adolescence and young adulthood [14]. The main motives for WP smoking are declared to be socializing, relaxation, pleasure and entertainment; this was suggested in a systematic review with qualitative data synthesis of numerous studies. Peer pressure, fashion, and curiosity were additional motives declared by university students, while expression of cultural identity seemed an additional motive for people in the Middle East [14, 15].

Among young cigarette smokers, students’ perceptions of smoking among the successful/elite and disapproval by parents/peers were independently associated with susceptibility to smoking [16]. In parallel, some epidemiological studies were conducted to evaluate these effects in case of WP smoking, and showed that parents’ tolerance of WP smoking, peer WP smoking and the idea of popularity were main motives for this behavior [17-19].

1  
2  
3 For cigarette dependence, earlier onset of at least once a month cigarette smoking, heavier  
4 overall consumption and peers' smoking were associated with higher nicotine dependence in  
5 Saudi young students [20]. Moreover, parental smoking restrictions may have the potential to  
6 impede adolescent progression to adult smoking behavior by reducing smoking rates and  
7 nicotine dependence [21].  
8  
9  
10  
11  
12

13  
14 In parallel, very few studies have been conducted to our knowledge regarding WP dependence,  
15 particularly in the Middle Eastern region, while normative beliefs have hardly been addressed.  
16 Thus, although we may know what drives WP smoking in youngsters, no studies have ever  
17 quantitatively assessed the magnitude of normative beliefs influences among university  
18 smokers on WP dependence, a more deleterious behavior for health. The objective of this study  
19 was to measure the correlates, including normative beliefs, associated with waterpipe and  
20 cigarette prevalence and dependence.  
21  
22  
23  
24  
25  
26  
27  
28  
29  
30  
31  
32  
33  
34  
35  
36  
37  
38  
39  
40  
41  
42  
43  
44  
45  
46  
47  
48  
49  
50  
51  
52  
53  
54  
55  
56  
57  
58  
59  
60

## Methods

### Population and sampling

A cross-sectional study was carried out; using a proportionate cluster sample of Lebanese students in the public and private universities. A list of universities in Lebanon, provided by the Center for Pedagogic Researches, was used to adjust the sample size [22]. A sample size of at least 3000 individuals was targeted to allow for adequate power for bivariate and multivariate analysis to be carried out on several factors; this sample size is powerful enough for any factor prevalence and association OR above 2.

Most universities' administrative offices in Lebanon that we approached did not allow drawing a random sample of their enrolled students to participate in the study: they did not provide us with the lists of students and permission was not granted to enter classrooms and search for students nominatively. Thus our research group had to work with a nonrandom sample of students outside their classes. Students were approached on campus during break times between courses by a field worker.

The latter explained the study objectives to the student; and after obtaining oral consent, the student was handed the anonymous and self-administered questionnaire. On average, the questionnaire was completed by participants within approximately 20 minutes. At the end of the process, the completed questionnaires were placed in closed boxes and sent for data entry. During the data collection process, the anonymity of the students was guaranteed, to allow for lower information bias. Out of 4900 distributed questionnaires, 3384 (69.1%) were returned to the field worker; the sample included students from 17 universities (the public university of Lebanon that accounts for half the university students in Lebanon and 16 private ones which account together for the other half). Further methodological details are presented in more details elsewhere [3].

## Questionnaires

The questionnaire used in this study was composed of several parts, including the socio-demographic part, and a detailed active and passive smoking history, in addition to items of the tobacco dependence questions. Socioeconomic status of students was defined using their mean monthly income per family divided by the number of family members; afterwards, quartiles were calculated and used to classify individuals into four levels.

Current WP smoking was defined as smoking at least one WP per month, while current cigarette smoking was defined as smoking at least one cigarette per day. For cigarette dependence, we used the Young Adults Cigarette Dependence (YACD) scale [23], and for waterpipe dependence, the LWDS-11 [13], both of which were developed by our team for the Lebanese population. The YACD has been developed for university students; it is composed of sixteen items, loading over six factors: nicotine dependence, craving intensity; positive reinforcement and negative reinforcement [23]. The LWDS-11 is composed of a 11 items, loading on a 4 factors structure in adults: nicotine physiological dependence, positive reinforcement, negative reinforcement, and psychological craving [13]; its validity and reliability had to be confirmed in this young adults' sample before use.

Moreover, normative beliefs questions were taken from a study performed on cigarette smokers by Primack and collaborators: measures of students' perceptions of smoking among successful people, cool people and idols, and disapproval by parents and peers were evaluated by Likert scale questions [16]: 0 indicated strongly disagree; 1, disagree; 2, maybe, 3, agree; and 4, strongly agree. These were further collapsed in bivariate analysis into yes (3 & 4), maybe (2), and no (0&1).

## Statistical analysis

Data entry was performed by independent lay persons that were unaware of the objectives of the study; these were masters' students that were not involved in data collection process. Data cleaning was performed by researchers, and a sample of 50 questionnaires was completely



1  
2  
3 checked for errors. The error rate was lower than 1%; thus, data entry was considered  
4  
5 adequate.  
6  
7

8  
9 Statistical analysis was performed using SPSS software, version 13.0. A p-value of 0.05 was  
10 considered significant. Cluster sampling effect was taken into account according to Rumeau-  
11 Roquette and collaborators [24]. Data weighting was performed according to the total number  
12 of students per university, as described by the Center for Educational Research and  
13 Development – Lebanese Ministry of Education [22].  
14  
15  
16  
17

18  
19  
20 To confirm the LWDS-11 validity and reliability in the study sample, an exploratory factor  
21 analysis was first performed with its items, after ensuring sample adequacy with the Kaiser-  
22 Meyer-Olkin (KMO) index, and Bartlett's Chi square test of sphericity. Factors were extracted  
23 using the principal component analysis. Items were retained if they loaded 0.4 or more on  
24 factors. Since factors were found to be correlated, we chose to perform a promax rotation with  
25 Kaiser normalization. Afterwards, reliability analysis was performed by Chronbach's alpha  
26 values for factors and the total scale.  
27  
28  
29  
30  
31  
32  
33

34  
35 Comparison of means was performed using ANOVA in bivariate analysis, with Bonferoni  
36 correction on post-hoc tests. Non parametric tests were used in case of small subgroups  
37 (Kruskall-Wallis and Wilcoxon tests, respectively).  
38  
39  
40  
41

42  
43 To decrease confounding bias, we performed multivariate analyses: multiple regressions were  
44 carried out using a stepwise backward method, after ensuring sample adequacy, linearity of the  
45 model, residual normality, and non collinearity of retained items (Variance Inflation Factor < 2).  
46 We took WP dependence and cigarette dependence as dependent variables in respective  
47 models, using socio-demographic characteristics normative beliefs and other forms of smoking  
48 (i.e. WP smoking among cigarette smokers and cigarette smoking among WP smokers) as  
49 independent variables. Both dependent variables were normally distributed. A p-value <0.05  
50  
51  
52  
53  
54  
55  
56  
57  
58  
59  
60

1  
2  
3 was considered significant; missing data was not replaced for this analysis due to their low  
4 percentage (<10%).  
5  
6  
7

8  
9 For indicative purposes, we also conducted multiple logistic regressions, using current  
10 waterpipe and cigarette smoking as dichotomous dependent variables respectively, and socio-  
11 demographic characteristics, other forms of smoking and normative beliefs as independent  
12 variables. After ensuring non colinearity and sampling adequacy by Hosmer-Lemeshow test, we  
13 reported adjusted odds ratios (aOR).  
14  
15  
16  
17  
18  
19  
20  
21  
22  
23  
24  
25  
26  
27  
28  
29  
30  
31  
32  
33  
34  
35  
36  
37  
38  
39  
40  
41  
42  
43  
44  
45  
46  
47  
48  
49  
50  
51  
52  
53  
54  
55  
56  
57  
58  
59  
60

## Results

Among 3384 university students, 779 (23%) reported they were current WP smokers, and 649(19.2%) that they were current cigarette smokers. Among WP smokers, 760 (97.6%) answered to all questions of the LWDS-11 scale, while among cigarette smokers, 595 (91.7%) answered to the complete YACD scale questions.

### Description of the current WP and cigarettes smokers' subsamples

Among WP smokers (n=779), the mean number of waterpipes smoked per week was 4.12 (SD=4.76), while the mean duration of smoking was 6.96 years (SD=2.33). The mean age of the first waterpipe intake was 16.46 years (SD=2.43). Among WP smokers, 35% declared having the intention to stop smoking later, and 20% declared wanting to stop smoking immediately. Moreover, 28.7% ever tried to stop smoking but did not succeed. LWDS mean was 10.23, its median was 9, and standard deviation 6.03. The minimum was zero and maximum 30. Its distribution was almost normal, with a skewness of 0.1.

Among cigarette smokers (n=649), the mean number of cigarettes smoked per day was 17.23 (SD=9.3), while the mean duration of smoking was 4.32 years (SD=2.25). The mean age of the first cigarette intake was 15.89 years (SD=2.35). Among cigarette smokers, 43.2% declared having the intention to stop smoking later, and 27.2% declared wanting to stop smoking immediately. Moreover, 48.7% ever tried to stop smoking but did not succeed. YACD mean was 13.92, its median was 14.04, and standard deviation 5.95. The minimum was 2.5 and maximum 29. Its distribution was almost normal, with a skewness of 0.6.

We note that 234(6.9% of the total students sample) were currently dual smokers of both cigarettes and WP. They constituted 36.4% of cigarette smokers and 30% of current WP smokers.

### **Validity and reliability of the LWDS-11 in Lebanese university students**

The Kaiser-Meyer-Olkin Measure of sampling adequacy was 0.79 ( $p < 0.001$ ). All communalities were higher than 0.35, and the extracted principal component sums of squared loadings explained 66.58% of the total variance.

The Promax rotation with Kaiser normalization gave a four factors solution with the following pattern (Table 1): factor 1 (physiological dependence; 33.14% of the variance explained), factor 2 (psychological craving; 13.08% of the variance explained), factor 3 (negative reinforcement; 11.59% of the variance explained) and factor 4 (positive reinforcement; 8.78% of the variance explained). Reliability measured by Cronbach's alpha for the total score was 0.77. We note that the structure is highly similar to the one found in adults, with one difference: the income item which originally loaded on physiological dependence, now loaded on psychological craving. For the rest of psychometric properties, the scale gave almost identical results.

Factors were correlated with each others: factor 1 correlated with factors 2 ( $r_{12}=0.42$ ), 3 ( $r_{13}=0.39$ ) and 4 ( $r_{14}=0.09$ ), factor 2 correlated with factors 3 ( $r_{23}=0.40$ ) and 4 ( $r_{24}=0.02$ ), and factor 3 correlated with factor 4 ( $r_{34}=0.14$ ).

### **Waterpipe and cigarette dependence variation with socio-demographic characteristics**

In table 2, we firstly present the characteristics of the whole sample of university students, for descriptive purposes. Waterpipe dependence was significantly higher in widow or divorced individuals, and among individuals who have higher numbers of smokers at home (table 2). However, cigarette dependence was higher in males, lower socioeconomic status individuals, the 20-21 years age class, the public university, and among individuals who have higher numbers of smokers at home; it was also lower in South Lebanon versus other regions (table 2).

### **Normative beliefs influence on waterpipe and cigarette dependence**

Waterpipe dependence was higher in case individuals believed that successful people smoke, rich people smoke, their idols smoke; it was lower in case individuals knew it was important for their parents, their friends and people of their age that they do not smoke (table 3). Nearly

1  
2  
3 similar results were found for cigarette dependence, except for an additional significant higher  
4 dependence in case individuals believed that cool people smoked, and a lower trend for  
5 significant for the peers' opinion about smoking (table 3).  
6  
7  
8  
9

### 10 **Multivariate analysis of WP and cigarette current smoking**

11 Studying in a private university and ever smoking cigarettes were correlated to current  
12 waterpipe smoking; moreover, thinking that successful and cool people smoke increased the  
13 odds of being a current waterpipe smoker, while having friends who disagree with smoking was  
14 correlated with lower waterpipe smoking (table 4). On another hand, being of male sex, not  
15 single, higher age, residing in Mount or North Lebanon, studying in a private university, and  
16 ever smoking waterpipes increase the odds of being a current cigarette smoker; thinking that  
17 successful people or idols smoke was correlated to increased cigarette smoking probability,  
18 while having parents who disagree with smoking was correlated with lower cigarette smoking  
19 (table 4).  
20  
21  
22  
23  
24  
25  
26  
27  
28  
29  
30  
31

### 32 **Multivariate analysis of WP and cigarette dependence**

33 In multiple regression of WP dependence, parents and friends' opinion against smoking were  
34 inversely associated while belief that idols smoke were positively associated with WP  
35 dependence; moreover, higher age class was also associated with higher WP dependence  
36 (Table 4). For cigarette dependence, parents' opinion against smoking was strongly and  
37 inversely associated, while the perception that idols, rich and successful people smoked were  
38 positively associated with cigarette dependence (Table 4).  
39  
40  
41  
42  
43  
44

45 We note that performing the analysis among dual smokers gave similar results of dependence  
46 correlates for both WP and cigarettes with normative beliefs, except for a visible association of  
47 dual dependence with male gender versus females (OR=5.10[2.83; 9.19]; p<0.001) (other  
48 results not shown).  
49  
50  
51  
52  
53  
54  
55  
56  
57  
58  
59  
60

## Discussion

In this study, we found that correlates of current WP smoking were studying in a private university (representing access to money), ever smoking cigarettes, and clear friends' and societal influence, as found in other studies [17-19; 25]. Moreover, friends' disagreement with smoking decreased WP dependence: in the latter case, smoking for conviviality during social gatherings is absent, and this component of positive reinforcement and cue for smoking in many individuals would be expected to affect individuals' dependence to WP [13]. Idols' smoking of university students increased the risk of WP dependence, which may also be considered the reverse side of the medal of the societal influence.

Age increased the risk of WP dependence; this may be explained by the establishment of this habit with time during life in university and more frequent exposure, or due to its possible insidious nature of dependence that may only appear after repeated exposures. The nature of WP dependence installation may differ from cigarette dependence that seems to install in young people after only a few cigarettes [26-28]. Indeed, Asfar et al have shown the existence of beginners and established WP smokers, the latter being less willing to quit WP smoking and more hooked on the habit [29].

Although the role of parents was not visible in decreasing the risk of smoking WP, their protective influence seemed more important on WP dependence; the latter behavior has been shown to be more deleterious for health [7, 8]. A social tolerance of WP smoking by parents may explain this finding [17], who may intervene with their offspring in case of dependence only; additional studies are necessary to evaluate whether parents are able to differentiate between occasional WP smokers and dependent WP smokers among their children.

As for cigarette smoking, numerous socio-demographic factors were found to correlate with the behavior: male sex, high age, married/widow/divorced marital status, residing in Mount and North Lebanon, studying in a private university and ever smoking waterpipes. Parents' disagreement with smoking had a protective effect on cigarette smoking and dependence,

1  
2  
3 while thinking that idols and successful people smoke increased the risk of both cigarette  
4 smoking and dependence, similarly to other researchers' findings [16; 30]. Friends influence  
5 was also visible, as with other studies [16; 30-31].  
6  
7  
8  
9

10 The idea of dual smoking deserves to be noted: smoking one kind of tobacco is associated with  
11 higher odds of smoking the other, and being dependent to one kind of tobacco increases the  
12 risk of dependence to other kinds. Similar results were found in British university students,  
13 where cigarette smoking was a major motive for waterpipe smoking [32] and in US students,  
14 where the majority of WP smokers were also cigarette smokers [33]. The fact that dependence  
15 to cigarettes and to waterpipe includes nicotine dependence components clearly explains this  
16 finding [11; 34-35]. This may also biologically be confirmed with results found by Rastam and  
17 collaborators, where cigarette and WP both decrease nicotine craving symptoms in dual  
18 smokers, and WP may interact with cigarette smoking cessation [36].  
19  
20  
21  
22  
23  
24  
25  
26  
27  
28  
29

30 One more conceptual issue deserves our attention: the LWDS-11 was of adequate validity and  
31 reliability in university students of Lebanon; the structure was highly similar to the one found in  
32 adults [13], with one difference: the income item which originally loaded on physiological  
33 dependence in adults, now loaded more adequately on psychological craving among students.  
34 One explanation could be that many adults adapt their smoking frequency and agree to pay  
35 portions of their incomes according to usual physiological nicotine needs, while younger  
36 university students would be ready to pay higher portions of their incomes only in case of  
37 extreme psychological craving (which is considered a more compelling urge than usual  
38 physiological dependence). Access to money being more limited for university students than for  
39 working adults may clarify this issue; in parallel, it is worth noting that in the YACD, the money  
40 item had also loaded on the psychological craving factor, not on the nicotine dependence factor  
41 [23]. Additional qualitative studies would be necessary to confirm this finding; nevertheless, the  
42 LWDS-11 demonstrated adequate validity and reliability, and could thus be used for the current  
43 study.  
44  
45  
46  
47  
48  
49  
50  
51  
52  
53  
54  
55  
56  
57  
58  
59  
60

## Limitations of the study

Our study, as with any, has its limitations: a selection bias could have been possible since the sample is not a random sample and may not be representative of the young adults and students' population in Lebanon. This non random sampling could lead to an overrepresentation of students who skip classes and may have higher risky behaviours, such as smoking. There could also be a possibility of respondent and information bias, since the results of our study are based on a self-administered questionnaire. Despite the fact that we ensured anonymity and confidentiality of all data that has been collected, respondents may have underreported some of their behaviours that lead to missing values. Furthermore, we have not taken into account all factors that may predict nicotine dependence, since it has been shown that background factors, psychological characteristics and genetic variation in nicotinic cholinergic receptors contribute independently or interactively to smoking initiation and to severity of nicotine dependence in young people [37]. We suggest that further research be carried taking into account these limitations; we also suggest prospective studies to thoroughly evaluate the effect of parents and friends on future smoking behaviours, in addition to qualitative research that can explore the knowledge, attitudes, and values behind these behaviours.

## Conclusion

In conclusion, WP smoking and dependence are influenced by parents' and friends' opinions, and idols' smoking status; these results suggest the potential possibility of establishing peer education and help parents advising their young offspring about the importance of non smoking WP. Future research is necessary to further improve our understanding of motives for WP smoking and dependence.



## What this study adds

- This is the first study exploring normative beliefs effect on waterpipe smoking in university students
- Although the role of parents was not visible in decreasing WP smoking WP, their protective influence decreased WP dependence, a more deleterious behavior for health.
- We found out that efforts should be made to establish peer education and help parents advising their young offspring about the importance of non smoking WP.

## Contributorship

All authors:

- Contributed to the study design and helped in data collection
- Contributed to the results' analysis reviewing
- Contributed to the manuscript drafting and reviewing

## Funding

This project was funded by the Lebanese-French cooperation program CEDRE; this program had no interventional role in the study design, data collection, analysis or manuscript writing.

## Competing interests

Authors have no competing interests to declare.

## Data Sharing

No additional data available

## References

- 1- Chaaya M, El-Roueiheb Z, Chemaitelly H, et al. Argileh smoking among university students: a new tobacco epidemic. *Nicotine Tob Res.* 2004; 6(3):457-63.
- 2- Waked M, Salameh P, Aoun Z. Water-pipe (Narguile) Smokers in Lebanon: A pilot study. *Eastern Mediterranean Health Journal* 2009; 15(2); 432-42.
- 3- Salameh P, Jomaa L, Issa C, et al: The Lebanese National Conference for Health in University (LNCHU) study group. Assessment of health risk behaviours among university students: a cross-sectional study in Lebanon. *International Journal of Adolescence and Youth* 2012a; 1-14. Available at: <http://dx.doi.org/10.1080/02673843.2012.733313>
- 4- El-Roueiheb Z, Tamim H, Kanj M, et al. Cigarette and waterpipe smoking among Lebanese adolescents, a cross-sectional study, 2003-2004. *Nicotine Tob Res.* 2008;10(2):309-14.
- 5- Cobb CO, Shihadeh A, Weaver MF, et al. Waterpipe tobacco smoking and cigarette smoking: a direct comparison of toxicant exposure and subjective effects. *Nicotine Tob Res.* 2011; 13(2):78-87.
- 6- Eissenberg T, Shihadeh A. Waterpipe tobacco and cigarette smoking: direct comparison of toxicant exposure. *Am J Prev Med.* 2009; 37(6):518-23.
- 7- Salameh P, Waked M, Khayat G, et al. Waterpipe smoking and dependence are associated with chronic bronchitis: a case control study. *Eastern Mediterranean Health Journal* 2012b; 18(10): 996-1004.
- 8- Salameh P, Khayat G, Waked M, et al. Waterpipe smoking and dependence are associated with Chronic Obstructive Pulmonary Disease: a case-control study. *The Open Epidemiology Journal*, 2012c; 5: 36-44.
- 9- Akl EA, Gaddam S, Gunukula SK et al. The effects of waterpipe tobacco smoking on health outcomes: a systematic review. *Int J Epidemiol.* 2010;39(3):834-57.
- 10- Aoun Z, Salameh P, Waked M. Saliva cotinine and exhaled carbon monoxide in real life waterpipe smokers. *Inhalation Toxicology* 2007; 19(9):771-7.
- 11- Salameh P, Aoun Z, Waked M. Saliva cotinine and exhaled carbon monoxide in real life narghile (waterpipe) smokers: a post hoc analysis. *Tobacco Use Insights* 2009 (2): 1-10.
- 12- Hammal F, Mock J, Ward KD, et al. A pleasure among friends: how narghile (waterpipe) smoking differs from cigarette smoking in Syria. *Tob Control.* 2008;17(2):e3.
- 13- Salameh P, Waked M, Aoun Z. Narguileh smoking: Construction and validation of the LWDS-11 dependence scale. *Nicotine & Tobacco Research* 2008; 10(1): 148-59.
- 14- Harakeh Z, Vollebergh WA. The impact of active and passive peer influence on young adult smoking: an experimental study. *Drug Alcohol Depend.* 2012; 121(3):220-3. doi: 10.1016/j.drugalcdep.2011.08.029.
- 15- Akl EA, Jawad M, Lam WY et al. Motives, beliefs and attitudes towards waterpipe tobacco smoking: a systematic review. *Harm Reduct J.* 2013; 10(1):12. doi: 10.1186/1477-7517-10-12.
- 16- Primack B, Switzer G, Dalton M. Improving Measurement of Normative Beliefs Involving Smoking Among Adolescents. *Arch Pediatr Adolesc Med.* 2007; 161:434-439

1  
2  
3 17-Sabahy AR, Divsalar K, Bahreinifar S, et al. Waterpipe tobacco use among Iranian university students: correlates  
4 and perceived reasons for use. *Int J Tuberc Lung Dis*. 2011;15(6):844-7.  
5

6 18-Roohafza H, Sadeghi M, Shahnam M, et al. Perceived factors related to cigarette and waterpipe (ghelyan)  
7 initiation and maintenance in university students of Iran. *Int J Public Health*. 2011; 56(2):175-80.  
8

9 19-Amin TT, Amr MA, Zaza BO, et al. Harm perception, attitudes and predictors of waterpipe (shisha) smoking  
10 among secondary school adolescents in Al-Hassa, Saudi Arabia. *Asian Pac J Cancer Prev*. 2010;11(2):293-301.  
11

12 20-Guo HJ, McGee R, Reeder T, et al. Smoking behaviours and contextual influences on adolescent nicotine  
13 dependence. *Aust N Z J Public Health*. 2010; 34(5):502-7.  
14

15 21-Ditre JW, Coraggio JT, Herzog TA. Associations between parental smoking restrictions and adolescent smoking.  
16 *Nicotine Tob Res*. 2008;10(6):975-83.  
17

18 22-Center for Educational research and Development, Beirut, Lebanon. [List of Universities in Lebanon]. Available  
19 on: <http://www.crdp.org/CRDP>  
20

21 23-Salameh P, Jomaa L, Farhat G, et al. The Lebanese National Conference for Health in Universities study group.  
22 The Young Adults' Cigarette Dependence (YACD) Score: An improved tool for cigarette dependence assessment in  
23 university students. *Addictive Behaviors*, 2013; 38(5): 2174-9.  
24

25 24-Rumeau-Rouquette, C., Breart, G., Padiou, R. (1985). Méthodes en Epidémiologie: Echantillonnage,  
26 investigations, analyse (pp. 71-82). Paris, Flammarion Editions. No DOI available.  
27

28 25-Al-Lawati JA, Muula AS, Hilmi SA, et al. Prevalence and Determinants of Waterpipe Tobacco Use among  
29 Adolescents in Oman. *Sultan Qaboos Univ Med J*. 2008; 8(1):37-43.  
30

31 26-DiFranza JR, Rigotti NA, McNeill AD, et al. Initial symptoms of nicotine dependence in adolescents. *Tob*  
32 *Control*. 2000; 9(3):313-9.  
33

34 27-Scragg R, Wellman RJ, Laugesen M, et al. Diminished autonomy over tobacco can appear with the first  
35 cigarettes. *Addict Behav*. 2008; 33(5):689-98.  
36

37 28-Ursprung WW, DiFranza JR. The loss of autonomy over smoking in relation to lifetime cigarette consumption.  
38 *Addict Behav*. 2010;35(1):14-8.  
39

40 29-Asfar T, Ward KD, Eissenberg T, et al. Comparison of patterns of use, beliefs, and attitudes related  
41 to waterpipe between beginning and established smokers. *BMC Public Health*. 2005; 5:19.  
42

43 30-Odukoya OO, Odeyemi KA, Oyeyemi AS, et al. Determinants of smoking initiation and susceptibility to  
44 future smoking among school-going adolescents in Lagos State, Nigeria. *Asian Pac J Cancer Prev*. 2013; 14(3):1747-  
45 53.  
46

47 31-Liao Y, Huang Z, Huh J, et al. Changes in friends' and parental influences on cigarette smoking from early  
48 through late adolescence. *J Adolesc Health*. 2013; 53(1):132-8.  
49

50 32-Jackson D, Aveyard P. Waterpipe smoking in students: prevalence, risk factors, symptoms of addiction, and  
51 smoke intake. Evidence from one British university. *BMC Public Health*. 2008; 8:174.  
52

53 33-Ward KD, Eissenberg T, Gray JN, Srinivas V, et al. Characteristics of U.S. waterpipe users: a preliminary report.  
54 *Nicotine Tob Res*. 2007;9(12):1339-46.  
55

1  
2  
3 34-Hudmon, K.S., Marks, J.L., Pomerleau, et al. A multidimensional model for characterizing tobacco dependence.  
4 *Nicotine & Tobacco Research* 2003 ; 5:655–64.  
5

6 35-Heatheron, T.F., Kozlowski, L.T., Frecker, et al. The Fagerström Test for Nicotine Dependence: a revision of the  
7 Fagerström Tolerance Questionnaire. *British Journal of Addiction* 1991 ; 86(9): 1119-27. No DOI available.  
8

9 36-Rastam S, Eissenberg T, Ibrahim I, et al. Comparative analysis of waterpipe and cigarette suppression of  
10 abstinence and craving symptoms. *Addict Behav.* 2011; 36(5): 555–559  
11

12 37-Greenbaum L, Kanyas K, Karni O et al. Why do young women smoke? I. Direct and interactive effects of  
13 environment, psychological characteristics and nicotinic cholinergic receptor genes. *Mol Psychiatry.* 2006;  
14 11(3):312-22, 223.  
15

16  
17  
18  
19  
20  
21  
22  
23  
24  
25  
26  
27  
28  
29  
30  
31  
32  
33  
34  
35  
36  
37  
38  
39  
40  
41  
42  
43  
44  
45  
46  
47  
48  
49  
50  
51  
52  
53  
54  
55  
56  
57  
58  
59  
60

For peer review only

**Table 1 – Validity and reliability of the LWDS-11 among university students of Lebanon**

| Items                                                                  | Factor 1<br>Physiological<br>dependence | Factor 2<br>Psychological<br>craving | Factor 3<br>Negative<br>reinforcement | Factor 4<br>Positive<br>reinforcement |
|------------------------------------------------------------------------|-----------------------------------------|--------------------------------------|---------------------------------------|---------------------------------------|
| How many times were you able to stay 7 days without smoking waterpipe? | 0.877                                   |                                      |                                       |                                       |
| How many days could you stay without smoking waterpipe?                | 0.871                                   |                                      |                                       |                                       |
| Number of smoked waterpipes per week?                                  | 0.798                                   |                                      |                                       |                                       |
| Would you smoke waterpipe even if you are ill/ bedridden?              |                                         | 0.836                                |                                       |                                       |
| Are you ready not to eat in exchange for a waterpipe?                  |                                         | 0.827                                |                                       |                                       |
| Would you smoke waterpipe alone?                                       |                                         | 0.547                                |                                       |                                       |
| How much of your income are you ready to pay for waterpipe smoking?    |                                         | 0.426                                |                                       |                                       |
| Smokes waterpipe to relax his nerves                                   |                                         |                                      | 0.868                                 |                                       |
| Smokes waterpipe to improve his morale                                 |                                         |                                      | 0.862                                 |                                       |
| Smokes waterpipe to please others (conviviality)                       |                                         |                                      |                                       | 0.910                                 |
| Smokes waterpipe for pleasure                                          |                                         |                                      |                                       | 0.573                                 |
| Cronbach's alpha reliability measure                                   | 0.806                                   | 0.659                                | 0.671                                 | 0.527                                 |

**Table 2 –LWDS-11 and YACD means in different socio-demographic categories of smokers**

| Characteristic†                  | Total<br>n=3384 | LWDS-11<br>Mean (SD) | p-value | YACD (SD)   | p-value |
|----------------------------------|-----------------|----------------------|---------|-------------|---------|
| Sex                              |                 |                      | 0.082   |             | 0.006   |
| Male                             | 1980(58.5%)     | 10.62(6.21)          |         | 14.22(5.95) |         |
| Female                           | 1399(41.3%)     | 9.86(5.84)           |         | 12.70(5.98) |         |
| Marital status                   |                 |                      | 0.006*  |             | 0.664   |
| Married                          | 115(3.4%)       | 10.00 (4.85)         |         | 14.76(7.65) |         |
| Single                           | 3243(95.8%)     | 10.19(6.02)          |         | 13.84(5.99) |         |
| Widow or divorced                | 9(0.3%)         | 17.50 (6.17)         |         | 11.5(0.00)  |         |
| Socio-economic status quartiles¶ |                 |                      | 0.35    |             | 0.051   |
| Quartile 1                       | 736(21.7%)      | 9.69(5.51)           |         | 15.61(6.09) |         |
| Quartile 2                       | 746(22.0%)      | 10.67(5.78)          |         | 14.11(6.11) |         |
| Quartile 3                       | 632(18.7%)      | 9.68(6.04)           |         | 13.51(5.65) |         |
| Quartile 4                       | 746(22.1%)      | 10.47(6.90)          |         | 13.70(5.95) |         |
| Age classes                      |                 |                      | 0.053** |             | <0.001* |
| 17-19 years                      | 958(28.3%)      | 9.42(5.86)           |         | 11.69(5.37) |         |
| 20-21 years                      | 1424(42.1%)     | 10.75(5.88)          |         | 14.93(5.90) |         |
| 22 years and more                | 982(29.0%)      | 10.14(6.36)          |         | 13.27(6.07) |         |
| Private university               | 1754(51.8%)     | 10.21(6.03)          | 0.422   | 13.33(5.88) | 0.005   |
| Public university                | 1630(48.2%)     | 9.86(6.07)           |         | 14.77(6.09) |         |
| Region                           |                 |                      | 0.135   |             | <0.001† |
| Beyrouth                         | 526(15.5%)      | 10.72(6.62)          |         | 13.21(5.99) |         |
| Mount Lebanon                    | 1606(47.5%)     | 9.55(6.03)           |         | 14.05(5.89) |         |
| North Lebanon                    | 505(14.9%)      | 10.91(4.87)          |         | 15.47(6.43) |         |
| South Lebanon                    | 474(14.0%)      | 10.55(6.21)          |         | 9.99(3.47)  |         |
| Bekaa plain                      | 221(6.5%)       | 9.95(6.07)           |         | 12.28(6.31) |         |
| Number of smokers at home        |                 |                      | <0.001* |             | <0.001‡ |
| No smokers                       | 896(26.5%)      | 9.00(5.51)           |         | 11.98(5.19) |         |
| One smoker                       | 1022(30.2%)     | 8.87 (5.65)          |         | 11.68(5.44) |         |
| Two smokers                      | 722(21.3%)      | 10.21(5.75)          |         | 12.46(5.45) |         |
| Three and more                   | 604(17.8%)      | 12.28(6.42)          |         | 16.21(5.92) |         |

†ANOVA was used in all comparisons, with Bonferoni adjustment; Kruskal-Wallis non parametric test was used for marital status due to small subgroup size, with further Wilcoxon two-by-two comparison. ¶ Socioeconomic status of students was defined using their mean monthly income per family divided by the number of family members; afterwards, quartiles were calculated and used to classify individuals into four levels; we note that 524(15.5%) gave no valid answer for socio-economic status \*All two by two differences were significant; \*\* Difference significant between the first two categories; # Difference between first and third categories was significant; ‡Difference significant between third category and others is significant; †South Lebanon significantly different from other regions

**Table 3 – LWDS-11 & YACD means bivariate analysis with societal influence**

| Characteristic†                                    | LWDS-11<br>Mean (SD) | p-value  | YACD<br>Mean (SD) | p-value |
|----------------------------------------------------|----------------------|----------|-------------------|---------|
| Successful people smoke                            |                      | <0.001*  |                   | <0.001¶ |
| Yes                                                | 9.93(5.80)           |          | 12.81(5.91)       |         |
| Maybe                                              | 9.61(5.61)           |          | 12.50(5.39)       |         |
| No                                                 | 11.92(6.90)          |          | 16.43(5.66)       |         |
| Cool people smoke                                  |                      | 0.163    |                   | 0.002#  |
| No                                                 | 9.93(6.30)           |          | 12.79(5.91)       |         |
| Maybe                                              | 9.91(5.99)           |          | 13.88(5.95)       |         |
| Yes                                                | 10.79(5.91)          |          | 14.76(5.94)       |         |
| Rich people smoke                                  |                      | 0.002*   |                   | <0.001¶ |
| No                                                 | 10.04(6.21)          |          | 12.71(5.89)       |         |
| Maybe                                              | 9.55(5.60)           |          | 13.72(5.89)       |         |
| Yes                                                | 11.79(5.86)          |          | 16.69(5.35)       |         |
| My idols smoke                                     |                      | 0.030#   |                   | <0.001¶ |
| No                                                 | 10.03(6.09)          |          | 12.49(5.78)       |         |
| Maybe                                              | 9.90(5.69)           |          | 12.86(5.96)       |         |
| Yes                                                | 11.43(6.58)          |          | 16.77(5.65)       |         |
| For my parents, it is important not to smoke       |                      | <0.001*  |                   | <0.001¶ |
| No                                                 | 13.25(6.88)          |          | 16.99(5.24)       |         |
| Maybe                                              | 10.28(6.17)          |          | 16.18(5.51)       |         |
| Yes                                                | 9.78(5.78)           |          | 12.57(5.77)       |         |
| For my friends, it is important not to smoke       |                      | <0.001** |                   | <0.001‡ |
| No                                                 | 12.22(6.50)          |          | 15.49(5.79)       |         |
| Maybe                                              | 10.00(5.65)          |          | 13.26(5.52)       |         |
| Yes                                                | 9.34(5.81)           |          | 13.05(6.19)       |         |
| For people of my age, it is important not to smoke |                      | 0.009*   |                   | 0.088   |
| No                                                 | 11.33(6.31)          |          | 14.53(6.04)       |         |
| Maybe                                              | 9.37(5.69)           |          | 13.45(5.70)       |         |
| Yes                                                | 9.79(6.03)           |          | 13.39(6.06)       |         |

†ANOVA was used in all comparisons, with Bonferoni adjustment; \*All two by two differences were significant; \*\* Difference significant between the first two categories; # Difference between first and third categories was significant; ¶Difference was not significant between categories 1 & 2; ‡Difference was not significant between categories 2 & 3

Table 4 – Multivariate analysis tobacco use and dependence

| <b>Binomial dependent variable</b>           | <b>Logistic regression Independent variables</b> | <b>Adjusted OR</b>                       | <b>[95% of CI]</b>                   | <b>p-value</b> |
|----------------------------------------------|--------------------------------------------------|------------------------------------------|--------------------------------------|----------------|
| Current waterpipe smoking <sup>†,‡</sup>     | Studying in a private university                 | 1.50                                     | [1.26;1.79]                          | <0.001         |
|                                              | Successful people smoke                          | 1.46                                     | [1.29;1.65]                          | <0.001         |
|                                              | Cool people smoke                                | 1.25                                     | [1.12;1.39]                          | <0.001         |
|                                              | Friends think it is important not to smoke       | 0.86                                     | [0.78;0.96]                          | 0.006          |
|                                              | Ever smoking cigarettes                          | 1.80                                     | [1.44;2.26]                          | <0.001         |
|                                              | Female sex versus male                           | 1.00                                     | [0.83;1.21]                          | 0.969          |
|                                              | Higher age class                                 | 1.01                                     | [0.90;1.13]                          | 0.871          |
| Current cigarette smoking <sup>†,‡</sup>     | Female sex versus male                           | 0.24                                     | [0.19;0.29]                          | <0.001         |
|                                              | Other than single marital status                 | 2.63                                     | [1.20;5.76]                          | 0.016          |
|                                              | Higher age class                                 | 1.37                                     | [1.19;1.57]                          | <0.001         |
|                                              | Mount Lebanon versus Beirut                      | 1.37                                     | [1.03;1.82]                          | 0.029          |
|                                              | North Lebanon versus Beirut                      | 1.46                                     | [1.00;2.13]                          | 0.053          |
|                                              | South Lebanon versus Beirut                      | 0.48                                     | [0.30;0.78]                          | 0.003          |
|                                              | Bekaa plain versus Beirut                        | 0.61                                     | [0.36;1.02]                          | 0.057          |
|                                              | Studying in a private university                 | 1.96                                     | [1.58;2.43]                          | <0.001         |
|                                              | Successful people smoke                          | 1.75                                     | [1.52;2.01]                          | <0.001         |
|                                              | My idols smoke                                   | 1.13                                     | [0.99;1.30]                          | 0.074          |
|                                              | Parents think it is important not to smoke       | 0.81                                     | [0.70;0.93]                          | 0.002          |
|                                              | Ever smoking waterpipes                          | 1.56                                     | [1.22;1.99]                          | <0.001         |
| <b>Continuous dependent variable</b>         | <b>Multiple regression Independent variables</b> | <b>Adjusted standardized beta values</b> | <b>Adjusted Beta values [95% CI]</b> | <b>p-value</b> |
| LWDS-11 among WP smokers <sup>*,‡</sup>      | Parents think it is important not to smoke       | -0.124                                   | -1.09[-1.79;-0.28]                   | 0.002          |
|                                              | Friends think it is important not to smoke       | -0.117                                   | -0.87[-1.46;-0.28]                   | 0.004          |
|                                              | My idols smoke                                   | 0.079                                    | 0.63[0.06;1.21]                      | 0.031          |
|                                              | Higher age class                                 | 0.069                                    | 0.58[-0.01;1.17]                     | 0.053          |
|                                              | Female sex versus Male                           | -0.019                                   | -0.23[-1.09;0.64]                    | 0.609          |
| YACD among cigarette smokers <sup>**,‡</sup> | Parents think it is important not to smoke       | -0.24                                    | -1.87[-2.45;-1.29]                   | <0.001         |
|                                              | My idols smoke                                   | 0.16                                     | 1.18[0.56;1.80]                      | <0.001         |
|                                              | Rich people smoke                                | 0.13                                     | 0.97[0.37;1.57]                      | 0.002          |
|                                              | Successful people smoke                          | 0.08                                     | 0.56[-0.02;1.14]                     | 0.059          |
|                                              | Higher age class                                 | 0.07                                     | 0.58[-0.06;1.21]                     | 0.075          |
|                                              | Female sex versus male                           | -0.06                                    | -0.77[-1.77;0.24]                    | 0.136          |

<sup>†</sup>Performed on whole university students sample; Conditions for sample adequacy satisfied; stepwise backward model; all other variables were not retained in the model. Gender and age class were forced in the models.

<sup>\*</sup>R=0.255; Adjusted R square=0.065; Stepwise model; VIF<2; residuals are normal; all other variables were not retained in the model. Gender and age class were forced in the models.

<sup>\*\*</sup>R=0.426; Adjusted R square=0.175; Stepwise model; VIF<2; residual are normal; all other variables were not retained in the model. Gender and age class were forced in the models.

<sup>‡</sup>Variables included in all models: marital status, socioeconomic classes, region of residence, private university (versus public), successful people smoke, cool people smoke, rich people smoke, my idols smoke, parents think it is important not to smoke, friends think it is important not to smoke, people of the same age think it is important not to smoke, smoking other type of tobacco. Gender and age class were forced in the models.



# Waterpipe dependence in university students: effect of normative beliefs

---

Salameh P<sup>1</sup>, Salamé J<sup>2</sup>, Waked M<sup>3</sup>, Barbour B<sup>4</sup>, Zeidan N<sup>4</sup>, Baldi I<sup>5</sup>

<sup>1</sup>*Clinical & Epidemiological Research Laboratory, Faculty of Pharmacy, Lebanese University, Hadath, Lebanon*

<sup>2</sup>*Charité – Universitätsmedizin University Hospital, Berlin, Germany*

<sup>3</sup>*Pulmonology department, Saint Georges Hospital & Faculty of Medicine, Balamand University, Beirut, Lebanon*

<sup>4</sup>*Faculty of Public Health, Lebanese University, Fanar, Lebanon*

<sup>5</sup>*Laboratoire Santé Travail Environnement, Université Bordeaux Segalen, Bordeaux, France*

Corresponding author:

Pascale Salameh, PharmD, MPH, PhD

Professor of Epidemiology

Jdeidet El Meten, Chalet Suisse street

Ramza Azzam bldg, 5<sup>th</sup> floor

Beirut, Lebanon

Tel: 009613385542

Fax: 009611696600

E-mail: [psalameh@ul.edu.lb](mailto:psalameh@ul.edu.lb) & [pascalesalameh1@hotmail.com](mailto:pascalesalameh1@hotmail.com)

## What this study adds

- This is the first study exploring normative beliefs effect on waterpipe smoking in university students
- Although the role of parents was not visible in decreasing WP smoking WP, their protective influence decreased WP dependence, a more deleterious behavior for health.
- We found out that efforts should be made to establish peer education and help parents advising their young offspring about the importance of non smoking WP.

## Contributorship

All authors:

- Contributed to the study design and helped in data collection
- Contributed to the results' analysis reviewing
- Contributed to the manuscript drafting and reviewing

## Funding

This project was funded by the Lebanese-French cooperation program CEDRE; this program had no interventional role in the study design, data collection, analysis or manuscript writing.

## Competing interests

Authors have no competing interests to declare.

# Waterpipe dependence in university students: effect of normative beliefs

---

## Abstract

**Background:** Waterpipe (WP) smoking is increasing in popularity, particularly in young people; this behavior is highly affected by peers and societal influence, and may induce addictive dependence, a more serious situation. The objective of this study was to measure the correlates, including normative beliefs, associated with waterpipe and cigarette prevalence and dependence. **Methods:** A cross-sectional study was carried out; using a proportionate cluster sample of Lebanese students in the public and private universities. The questionnaire used in this study was composed of several parts, including the socio-demographic part, and a detailed active and passive smoking history, in addition to items of the tobacco dependence scales.

**Results:** Correlates to WP smoking were studying in a private university and ever smoking cigarettes; clear friends' and societal influence were found on smoking behavior and dependence. *Although the role of parents was not visible in decreasing the risk of smoking WP, their protective influence seemed more important on WP dependence, a behavior that is considered more deleterious for health.* Parents' and friends' disagreement with smoking had a protective effect on cigarette smoking and dependence, while thinking that idols and successful people smoke increased the risk of both cigarette smoking and dependence. **Conclusion:** *In conclusion, WP smoking and dependence are influenced by parents' and friends' opinions, and idols' smoking status; these results suggest the potential possibility of establishing peer education and help parents advising their young offspring about the importance of non smoking WP. Future research is necessary to further improve our understanding of motives for WP smoking and dependence.*

**Keywords:** waterpipe, smoking, dependence, LWDS-11, YACD, peer pressure, parental guidance, normative belief.

## Article summary

### Strengths of the study

- This is the epidemiological first study exploring normative beliefs effect on waterpipe smoking in university students
- This is the first study in the region concerning WP dependence in university students
- The study was conducted over a large number of university students in Lebanon
- Anonymity and non traceability of participants increases the possibility of straight answers
- The study showed that parents' opinion did not affect WP smokers, while it had a protective effect against WP dependence.

### Limitations of the study

- The sample was not random, thus a selection bias could not be excluded
- Information bias is also possible, because results were based on self declared answers
- The use of self completed questionnaires may increase the risk of non response to certain items
- We have not taken into account all factors that may predict nicotine dependence
- Qualitative studies could be useful to further explain the results we obtained

## Introduction

Waterpipe (WP) smoking is increasing in popularity, particularly among young people and university students [1-4]. WP is thought to contain toxic substances, similar to those contained in cigarette [5-6]. WP has been shown to increase the risk of several diseases, including chronic bronchitis [7], COPD [8], lung cancer [9], and other ailments [9].

WP has also been demonstrated to contain nicotine, the substance responsible, at least partially, of addictive effects [10; 11]. It has been associated to an identified dependence effect similar to what could be found with cigarette, in addition to a social factor that adds to its potential addictive effect [12]; as expected, WP dependence per se was associated with higher smoking frequency and higher risk of health effects among WP smokers, as compared to non dependent WP smokers [7,8].

The structure of the WP associated dependence concept was shaped by the previous development and validation of a specific score, the Lebanese Waterpipe Dependence Scale-11 (LWDS-11) [13]. The score included items of “smoking to please others” and “smoking for pleasure”, two items shown to have a high importance in late adolescence and young adulthood [14]. The main motives for WP smoking are declared to be socializing, relaxation, pleasure and entertainment; this was suggested in a systematic review with qualitative data synthesis of numerous studies. Peer pressure, fashion, and curiosity were additional motives declared by university students, while expression of cultural identity seemed an additional motive for people in the Middle East [14, 15].

Among young cigarette smokers, students’ perceptions of smoking among the successful/elite and disapproval by parents/peers were independently associated with susceptibility to smoking [16]. In parallel, some epidemiological studies were conducted to evaluate these effects in case of WP smoking, and showed that parents’ tolerance of WP smoking, peer WP smoking and the idea of popularity were main motives for this behavior [17-19].

1  
2  
3 For cigarette dependence, earlier onset of at least once a month cigarette smoking, heavier  
4 overall consumption and peers' smoking were associated with higher nicotine dependence in  
5 Saudi young students [20]. Moreover, parental smoking restrictions may have the potential to  
6 impede adolescent progression to adult smoking behavior by reducing smoking rates and  
7 nicotine dependence [21].  
8  
9  
10  
11  
12

13  
14 In parallel, very few studies have been conducted to our knowledge regarding WP dependence,  
15 particularly in the Middle Eastern region, while normative beliefs have hardly been addressed.  
16

17 Thus, although we may know what drives WP smoking in youngsters, no studies have ever  
18 quantitatively assessed the magnitude of normative beliefs influences among university  
19 smokers on WP dependence, a more deleterious behavior for health. The objective of this study  
20 was to measure the correlates, including normative beliefs, associated with waterpipe and  
21 cigarette prevalence and dependence.  
22  
23  
24  
25  
26  
27  
28  
29  
30  
31  
32  
33  
34  
35  
36  
37  
38  
39  
40  
41  
42  
43  
44  
45  
46  
47  
48  
49  
50  
51  
52  
53  
54  
55  
56  
57  
58  
59  
60

## Methods

### Population and sampling

A cross-sectional study was carried out; using a proportionate cluster sample of Lebanese students in the public and private universities. A list of universities in Lebanon, provided by the Center for Pedagogic Researches, was used to adjust the sample size [22]. A sample size of at least 3000 individuals was targeted to allow for adequate power for bivariate and multivariate analysis to be carried out on several factors; **this sample size is powerful enough for any factor prevalence and association OR above 2.**

Most universities' administrative offices in Lebanon that we approached did not allow drawing a random sample of their enrolled students to participate in the study: they did not provide us with the lists of students and permission was not granted to enter classrooms and search for students nominatively. Thus our research group had to work with a nonrandom sample of students outside their classes. Students were approached on campus during break times between courses by a field worker.

The latter explained the study objectives to the student; and after obtaining oral consent, the student was handed the anonymous and self-administered questionnaire. On average, the questionnaire was completed by participants within approximately 20 minutes. At the end of the process, the completed questionnaires were placed in closed boxes and sent for data entry. During the data collection process, the anonymity of the students was guaranteed, to allow for lower information bias. Out of 4900 distributed questionnaires, 3384 (69.1%) were returned to the field worker; **the sample included students from 17 universities (the public university of Lebanon that accounts for half the university students in Lebanon and 16 private ones which account together for the other half).** Further methodological details are presented in more details elsewhere [3].

## Questionnaires

The questionnaire used in this study was composed of several parts, including the socio-demographic part, and a detailed active and passive smoking history, in addition to items of the tobacco dependence questions. Socioeconomic status of students was defined using their mean monthly income per family divided by the number of family members; afterwards, quartiles were calculated and used to classify individuals into four levels.

Current WP smoking was defined as smoking at least one WP per month, while current cigarette smoking was defined as smoking at least one cigarette per day. For cigarette dependence, we used the Young Adults Cigarette Dependence (YACD) scale [23], and for waterpipe dependence, the LWDS-11 [13], both of which were developed by our team for the Lebanese population. The YACD has been developed for university students; it is composed of sixteen items, loading over six factors: nicotine dependence, craving intensity; positive reinforcement and negative reinforcement [23]. The LWDS-11 is composed of a 11 items, loading on a 4 factors structure in adults: nicotine physiological dependence, positive reinforcement, negative reinforcement, and psychological craving [13]; its validity and reliability had to be confirmed in this young adults' sample before use.

Moreover, normative beliefs questions were taken from a study performed on cigarette smokers by Primack and collaborators: measures of students' perceptions of smoking among successful people, cool people and idols, and disapproval by parents and peers were evaluated by Likert scale questions [16]: 0 indicated strongly disagree; 1, disagree; 2, maybe, 3, agree; and 4, strongly agree. These were further collapsed in bivariate analysis into yes (3 & 4), maybe (2), and no (0&1).

## Statistical analysis

Data entry was performed by independent lay persons that were unaware of the objectives of the study; these were masters' students that were not involved in data collection process. Data cleaning was performed by researchers, and a sample of 50 questionnaires was completely



1  
2  
3 checked for errors. The error rate was lower than 1%; thus, data entry was considered  
4  
5 adequate.  
6  
7

8  
9 Statistical analysis was performed using SPSS software, version 13.0. A p-value of 0.05 was  
10 considered significant. Cluster sampling effect was taken into account according to Rumeau-  
11 Roquette and collaborators [24]. Data weighting was performed according to the total number  
12 of students per university, as described by the Center for Educational Research and  
13 Development – Lebanese Ministry of Education [22].  
14  
15  
16  
17

18  
19  
20 To confirm the LWDS-11 validity and reliability in the study sample, an exploratory factor  
21 analysis was first performed with its items, after ensuring sample adequacy with the Kaiser-  
22 Meyer-Olkin (KMO) index, and Bartlett's Chi square test of sphericity. Factors were extracted  
23 using the principal component analysis. Items were retained if they loaded 0.4 or more on  
24 factors. Since factors were found to be correlated, we chose to perform a promax rotation with  
25 Kaiser normalization. Afterwards, reliability analysis was performed by Chronbach's alpha  
26 values for factors and the total scale.  
27  
28  
29  
30  
31  
32  
33

34  
35 Comparison of means was performed using ANOVA in bivariate analysis, with Bonferoni  
36 correction on post-hoc tests. Non parametric tests were used in case of small subgroups  
37 (Kruskall-Wallis and Wilcoxon tests, respectively).  
38  
39  
40  
41  
42

43 To decrease confounding bias, we performed multivariate analyses: multiple regressions were  
44 carried out using a stepwise backward method, after ensuring sample adequacy, linearity of the  
45 model, residual normality, and non collinearity of retained items (Variance Inflation Factor < 2).  
46 We took WP dependence and cigarette dependence as dependent variables in respective  
47 models, using socio-demographic characteristics normative beliefs and other forms of smoking  
48 (i.e. WP smoking among cigarette smokers and cigarette smoking among WP smokers) as  
49 independent variables. Both dependent variables were normally distributed. A p-value <0.05  
50  
51  
52  
53  
54  
55  
56  
57  
58  
59  
60

1  
2  
3 was considered significant; missing data was not replaced for this analysis due to their low  
4 percentage (<10%).  
5  
6  
7

8  
9 For indicative purposes, we also conducted multiple logistic regressions, using current  
10 waterpipe and cigarette smoking as dichotomous dependent variables respectively, and socio-  
11 demographic characteristics, other forms of smoking and normative beliefs as independent  
12 variables. After ensuring non colinearity and sampling adequacy by Hosmer-Lemeshow test, we  
13 reported adjusted odds ratios (aOR).  
14  
15  
16  
17  
18  
19  
20  
21  
22  
23  
24  
25  
26  
27  
28  
29  
30  
31  
32  
33  
34  
35  
36  
37  
38  
39  
40  
41  
42  
43  
44  
45  
46  
47  
48  
49  
50  
51  
52  
53  
54  
55  
56  
57  
58  
59  
60

## Results

Among 3384 university students, 779 (23%) reported they were current WP smokers, and 649(19.2%) that they were current cigarette smokers. Among WP smokers, 760 (97.6%) answered to all questions of the LWDS-11 scale, while among cigarette smokers, 595 (91.7%) answered to the complete YACD scale questions.

### Description of the current WP and cigarettes smokers' subsamples

Among WP smokers (n=779), the mean number of waterpipes smoked per week was 4.12 (SD=4.76), while the mean duration of smoking was 6.96 years (SD=2.33). The mean age of the first waterpipe intake was 16.46 years (SD=2.43). Among WP smokers, 35% declared having the intention to stop smoking later, and 20% declared wanting to stop smoking immediately. Moreover, 28.7% ever tried to stop smoking but did not succeed. LWDS mean was 10.23, its median was 9, and standard deviation 6.03. The minimum was zero and maximum 30. Its distribution was almost normal, with a skewness of 0.1.

Among cigarette smokers (n=649), the mean number of cigarettes smoked per day was 17.23 (SD=9.3), while the mean duration of smoking was 4.32 years (SD=2.25). The mean age of the first cigarette intake was 15.89 years (SD=2.35). Among cigarette smokers, 43.2% declared having the intention to stop smoking later, and 27.2% declared wanting to stop smoking immediately. Moreover, 48.7% ever tried to stop smoking but did not succeed. YACD mean was 13.92, its median was 14.04, and standard deviation 5.95. The minimum was 2.5 and maximum 29. Its distribution was almost normal, with a skewness of 0.6.

We note that 234(6.9% of the total students sample) were currently dual smokers of both cigarettes and WP. They constituted 36.4% of cigarette smokers and 30% of current WP smokers.

### Validity and reliability of the LWDS-11 in Lebanese university students

The Kaiser-Meyer-Olkin Measure of sampling adequacy was 0.79 ( $p < 0.001$ ). All communalities were higher than 0.35, and the extracted principal component sums of squared loadings explained 66.58% of the total variance.

The Promax rotation with Kaiser normalization gave a four factors solution with the following pattern (Table 1): factor 1 (physiological dependence; 33.14% of the variance explained), factor 2 (psychological craving; 13.08% of the variance explained), factor 3 (negative reinforcement; 11.59% of the variance explained) and factor 4 (positive reinforcement; 8.78% of the variance explained). Reliability measured by Cronbach's alpha for the total score was 0.77. We note that the structure is highly similar to the one found in adults, with one difference: the income item which originally loaded on physiological dependence, now loaded on psychological craving. For the rest of psychometric properties, the scale gave almost identical results.

Factors were correlated with each others: factor 1 correlated with factors 2 ( $r_{12}=0.42$ ), 3 ( $r_{13}=0.39$ ) and 4 ( $r_{14}=0.09$ ), factor 2 correlated with factors 3 ( $r_{23}=0.40$ ) and 4 ( $r_{24}=0.02$ ), and factor 3 correlated with factor 4 ( $r_{34}=0.14$ ).

### Waterpipe and cigarette dependence variation with socio-demographic characteristics

In table 2, we firstly present the characteristics of the whole sample of university students, for descriptive purposes. Waterpipe dependence was significantly higher in widow or divorced individuals, and among individuals who have higher numbers of smokers at home (table 2). However, cigarette dependence was higher in males, lower socioeconomic status individuals, the 20-21 years age class, the public university, and among individuals who have higher numbers of smokers at home; it was also lower in South Lebanon versus other regions (table 2).

### Normative beliefs influence on waterpipe and cigarette dependence

Waterpipe dependence was higher in case individuals believed that successful people smoke, rich people smoke, their idols smoke; it was lower in case individuals knew it was important for their parents, their friends and people of their age that they do not smoke (table 3). Nearly

1  
2  
3 similar results were found for cigarette dependence, except for an additional significant higher  
4 dependence in case individuals believed that cool people smoked, and a lower trend for  
5 significant for the peers' opinion about smoking (table 3).  
6  
7  
8  
9

### 10 **Multivariate analysis of WP and cigarette current smoking**

11 Studying in a private university and ever smoking cigarettes were correlated to current  
12 waterpipe smoking; moreover, thinking that successful and cool people smoke increased the  
13 odds of being a current waterpipe smoker, while having friends who disagree with smoking was  
14 correlated with lower waterpipe smoking (table 4). On another hand, being of male sex, not  
15 single, higher age, residing in Mount or North Lebanon, studying in a private university, and  
16 ever smoking waterpipes increase the odds of being a current cigarette smoker; thinking that  
17 successful people or idols smoke was correlated to increased cigarette smoking probability,  
18 while having parents who disagree with smoking was correlated with lower cigarette smoking  
19 (table 4).  
20  
21  
22  
23  
24  
25  
26  
27  
28  
29  
30  
31

### 32 **Multivariate analysis of WP and cigarette dependence**

33 In multiple regression of WP dependence, parents and friends' opinion against smoking were  
34 inversely associated while belief that idols smoke were positively associated with WP  
35 dependence; moreover, higher age class was also associated with higher WP dependence  
36 (Table 4). For cigarette dependence, parents' opinion against smoking was strongly and  
37 inversely associated, while the perception that idols, rich and successful people smoked were  
38 positively associated with cigarette dependence (Table 4).  
39  
40  
41  
42  
43  
44

45 **We note that performing the analysis among dual smokers gave similar results of dependence**  
46 **correlates for both WP and cigarettes with normative beliefs, except for a visible association of**  
47 **dual dependence with male gender versus females (OR=5.10[2.83; 9.19]; p<0.001) (other**  
48 **results not shown).**  
49  
50  
51  
52  
53  
54  
55  
56  
57  
58  
59  
60

## Discussion

In this study, we found that correlates of current WP smoking were studying in a private university (representing access to money), ever smoking cigarettes, and clear friends' and societal influence, as found in other studies [17-19; 25]. Moreover, friends' disagreement with smoking decreased WP dependence: in the latter case, smoking for conviviality during social gatherings is absent, and this component of positive reinforcement and cue for smoking in many individuals would be expected to affect individuals' dependence to WP [13]. Idols' smoking of university students increased the risk of WP dependence, which may also be considered the reverse side of the medal of the societal influence.

Age increased the risk of WP dependence; this may be explained by the establishment of this habit with time during life in university and more frequent exposure, or due to its possible insidious nature of dependence that may only appear after repeated exposures. The nature of WP dependence installation may differ from cigarette dependence that seems to install in young people after only a few cigarettes [26-28]. Indeed, Asfar et al have shown the existence of beginners and established WP smokers, the latter being less willing to quit WP smoking and more hooked on the habit [29].

Although the role of parents was not visible in decreasing the risk of smoking WP, their protective influence seemed more important on WP dependence; the latter behavior has been shown to be more deleterious for health [7, 8]. A social tolerance of WP smoking by parents may explain this finding [17], who may intervene with their offspring in case of dependence only; additional studies are necessary to evaluate whether parents are able to differentiate between occasional WP smokers and dependent WP smokers among their children.

As for cigarette smoking, numerous socio-demographic factors were found to correlate with the behavior: male sex, high age, married/widow/divorced marital status, residing in Mount and North Lebanon, studying in a private university and ever smoking waterpipes. Parents' disagreement with smoking had a protective effect on cigarette smoking and dependence,

1  
2  
3 while thinking that idols and successful people smoke increased the risk of both cigarette  
4 smoking and dependence, similarly to other researchers' findings [16; 30]. Friends influence  
5 was also visible, as with other studies [16; 30-31].  
6  
7  
8  
9

10 The idea of dual smoking deserves to be noted: smoking one kind of tobacco is associated with  
11 higher odds of smoking the other, and being dependent to one kind of tobacco increases the  
12 risk of dependence to other kinds. Similar results were found in British university students,  
13 where cigarette smoking was a major motive for waterpipe smoking [32] and in US students,  
14 where the majority of WP smokers were also cigarette smokers [33]. The fact that dependence  
15 to cigarettes and to waterpipe includes nicotine dependence components clearly explains this  
16 finding [11; 34-35]. This may also biologically be confirmed with results found by Rastam and  
17 collaborators, where cigarette and WP both decrease nicotine craving symptoms in dual  
18 smokers, and WP may interact with cigarette smoking cessation [36].  
19  
20  
21  
22  
23  
24  
25  
26  
27  
28  
29

30 **One more conceptual issue deserves our attention: the LWDS-11 was of adequate validity and**  
31 **reliability in university students of Lebanon;** the structure was highly similar to the one found in  
32 adults [13], with one difference: the income item which originally loaded on physiological  
33 dependence in adults, now loaded more adequately on psychological craving among students.  
34 One explanation could be that many adults adapt their smoking frequency and agree to pay  
35 portions of their incomes according to usual physiological nicotine needs, while younger  
36 university students would be ready to pay higher portions of their incomes only in case of  
37 **extreme psychological craving (which is considered a more compelling urge than usual**  
38 **physiological dependence).** **Access to money being more limited for university students than for**  
39 **working adults may clarify this issue;** in parallel, it is worth noting that in the YACD, the money  
40 item had also loaded on the psychological craving factor, not on the nicotine dependence factor  
41 [23]. Additional qualitative studies would be necessary to confirm this finding; nevertheless, the  
42 LWDS-11 demonstrated adequate validity and reliability, and could thus be used for the current  
43 study.  
44  
45  
46  
47  
48  
49  
50  
51  
52  
53  
54  
55  
56  
57  
58  
59  
60

## Limitations of the study

Our study, as with any, has its limitations: a selection bias could have been possible since the sample is not a random sample and may not be representative of the young adults and students' population in Lebanon. This non random sampling could lead to an overrepresentation of students who skip classes and may have higher risky behaviours, such as smoking. There could also be a possibility of respondent and information bias, since the results of our study are based on a self-administered questionnaire. Despite the fact that we ensured anonymity and confidentiality of all data that has been collected, respondents may have underreported some of their behaviours that lead to missing values. Furthermore, we have not taken into account all factors that may predict nicotine dependence, since it has been shown that background factors, psychological characteristics and genetic variation in nicotinic cholinergic receptors contribute independently or interactively to smoking initiation and to severity of nicotine dependence in young people [37]. We suggest that further research be carried taking into account these limitations; we also suggest prospective studies to thoroughly evaluate the effect of parents and friends on future smoking behaviours, **in addition to qualitative research that can explore the knowledge, attitudes, and values behind these behaviours.**

## Conclusion

**In conclusion, WP smoking and dependence are influenced by parents' and friends' opinions, and idols' smoking status; these results suggest the potential possibility of establishing peer education and help parents advising their young offspring about the importance of non smoking WP. Future research is necessary to further improve our understanding of motives for WP smoking and dependence.**



## References

- 1- Chaaya M, El-Roueiheb Z, Chemaitelly H, Azar G, Nasr J, Al-Sahab B. Argileh smoking among university students: a new tobacco epidemic. *Nicotine Tob Res.* 2004; 6(3):457-63.
- 2- Waked M, Salameh P, Aoun Z. Water-pipe (Narguile) Smokers in Lebanon: A pilot study. *Eastern Mediterranean Health Journal* 2009; 15(2); 432-42.
- 3- Salameh P, Jomaa L, Issa C, Farhat G, Zeghondi H, Gerges N, Sabbagh MT, Chaaya M, Barbour B, Waked M, Salamé J, Zeidan N, Baldi I: The Lebanese National Conference for Health in University (LNCHU) study group. Assessment of health risk behaviours among university students: a cross-sectional study in Lebanon. *International Journal of Adolescence and Youth* 2012a; 1-14. Available at: <http://dx.doi.org/10.1080/02673843.2012.733313>
- 4- El-Roueiheb Z, Tamim H, Kanj M, Jabbour S, Alayan I, Musharrafieh U. Cigarette and waterpipe smoking among Lebanese adolescents, a cross-sectional study, 2003-2004. *Nicotine Tob Res.* 2008;10(2):309-14.
- 5- Cobb CO, Shihadeh A, Weaver MF, Eissenberg T. Waterpipe tobacco smoking and cigarette smoking: a direct comparison of toxicant exposure and subjective effects. *Nicotine Tob Res.* 2011; 13(2):78-87.
- 6- Eissenberg T, Shihadeh A. Waterpipe tobacco and cigarette smoking: direct comparison of toxicant exposure. *Am J Prev Med.* 2009; 37(6):518-23.
- 7- Salameh P, Waked M, Khayat G, Khoury F, Akiki Z, Nasser Z, Abou Abbass L, Azizi S, Saadeh D, Akhdar A, Ziadeh C, Salame J, Dramaix M. Waterpipe smoking and dependence are associated with chronic bronchitis: a case control study. *Eastern Mediterranean Health Journal* 2012b; 18(10): 996-1004.
- 8- Salameh P, Khayat G, Waked M, Dramaix M. Waterpipe smoking and dependence are associated with Chronic Obstructive Pulmonary Disease: a case-control study. *The Open Epidemiology Journal*, 2012c; 5: 36-44.
- 9- Akl EA, Gaddam S, Gunukula SK, Honeine R, Jaoude PA, Irani J. The effects of waterpipe tobacco smoking on health outcomes: a systematic review. *Int J Epidemiol.* 2010;39(3):834-57.
- 10- Aoun Z, Salameh P, Waked M. Saliva cotinine and exhaled carbon monoxide in real life waterpipe smokers. *Inhalation Toxicology* 2007; 19(9):771-7.
- 11- Salameh P, Aoun Z, Waked M. Saliva cotinine and exhaled carbon monoxide in real life narghile (waterpipe) smokers: a post hoc analysis. *Tobacco Use Insights* 2009 (2): 1-10.
- 12- Hammal F, Mock J, Ward KD, Eissenberg T, Maziak W. A pleasure among friends: how narghile (waterpipe) smoking differs from cigarette smoking in Syria. *Tob Control.* 2008;17(2):e3.
- 13- Salameh P, Waked M, Aoun Z. Narguileh smoking: Construction and validation of the LWDS-11 dependence scale. *Nicotine & Tobacco Research* 2008; 10(1): 148-59.
- 14- Harakeh Z, Vollebergh WA. The impact of active and passive peer influence on young adult smoking: an experimental study. *Drug Alcohol Depend.* 2012; 121(3):220-3. doi: 10.1016/j.drugalcdep.2011.08.029.
- 15- Akl EA, Jawad M, Lam WY, Co CN, Obeid R, Irani J. Motives, beliefs and attitudes towards waterpipe tobacco smoking: a systematic review. *Harm Reduct J.* 2013; 10(1):12. doi: 10.1186/1477-7517-10-12.
- 16- Primack B, Switzer G, Dalton M. Improving Measurement of Normative Beliefs Involving Smoking Among Adolescents. *Arch Pediatr Adolesc Med.* 2007; 161:434-439

- 1  
2  
3 17-Sabahy AR, Divsalar K, Bahreinifar S, Marzban M, Nakhaee N. Waterpipe tobacco use among Iranian university  
4 students: correlates and perceived reasons for use. *Int J Tuberc Lung Dis*. 2011;15(6):844-7.  
5  
6 18-Roohafza H, Sadeghi M, Shahnam M, Bahonar A, Sarafzadegan N. Perceived factors related to cigarette  
7 and waterpipe (ghelyan) initiation and maintenance in university students of Iran. *Int J Public Health*. 2011;  
8 56(2):175-80.  
9  
10 19-Amin TT, Amr MA, Zaza BO, Suleman W. Harm perception, attitudes and predictors of waterpipe (shisha)  
11 smoking among secondary school adolescents in Al-Hassa, Saudi Arabia. *Asian Pac J Cancer Prev*. 2010;11(2):293-  
12 301.  
13  
14 20-Guo HJ, McGee R, Reeder T, Gray A. Smoking behaviours and contextual influences on adolescent nicotine  
15 dependence. *Aust N Z J Public Health*. 2010; 34(5):502-7.  
16  
17 21-Ditre JW, Coraggio JT, Herzog TA. Associations between parental smoking restrictions and adolescent smoking.  
18 *Nicotine Tob Res*. 2008;10(6):975-83.  
19  
20 22-Center for Educational research and Development, Beirut, Lebanon. [List of Universities in Lebanon]. Available  
21 on: <http://www.crdp.org/CRDP>  
22  
23 23-Salameh P, Jomaa L, Farhat G, Zeghondi H, Gerges N, Issa C, Sabbagh MT, Chaaya M, Barbour B, Waked M,  
24 Salamé J, Saadallah-Zeidan N, Baldi I. The Lebanese National Conference for Health in Universities study group. The  
25 Young Adults' Cigarette Dependence (YACD) Score: An improved tool for cigarette dependence assessment in  
26 university students. *Addictive Behaviors*, 2013; 38(5): 2174-9.  
27  
28 24-Rumeau-Rouquette, C., Breart, G., Padiou, R. (1985). Méthodes en Epidémiologie: Echantillonnage,  
29 investigations, analyse (pp. 71-82). Paris, Flammarion Editions. No DOI available.  
30  
31 25-Al-Lawati JA, Muula AS, Hilmi SA, Rudatsikira E. Prevalence and Determinants of Waterpipe Tobacco Use among  
32 Adolescents in Oman. *Sultan Qaboos Univ Med J*. 2008; 8(1):37-43.  
33  
34 26-DiFranza JR, Rigotti NA, McNeill AD, Ockene JK, Savageau JA, St Cyr D, Coleman M. Initial symptoms of nicotine  
35 dependence in adolescents. *Tob Control*. 2000; 9(3):313-9.  
36  
37 27-Scragg R, Wellman RJ, Laugesen M, DiFranza JR. Diminished autonomy over tobacco can appear with the first  
38 cigarettes. *Addict Behav*. 2008; 33(5):689-98.  
39  
40 28-Ursprung WW, DiFranza JR. The loss of autonomy over smoking in relation to lifetime cigarette consumption.  
41 *Addict Behav*. 2010;35(1):14-8.  
42  
43 29-Asfar T, Ward KD, Eissenberg T, Maziak W. Comparison of patterns of use, beliefs, and attitudes related  
44 to waterpipe between beginning and established smokers. *BMC Public Health*. 2005; 5:19.  
45  
46 30-Odukoya OO, Odeyemi KA, Oyeyemi AS, Upadhyay RP. Determinants of smoking initiation and susceptibility to  
47 future smoking among school-going adolescents in Lagos State, Nigeria. *Asian Pac J Cancer Prev*. 2013; 14(3):1747-  
48 53.  
49  
50 31-Liao Y, Huang Z, Huh J, Pentz MA, Chou CP. Changes in friends' and parental influences on  
51 cigarette smoking from early through late adolescence. *J Adolesc Health*. 2013; 53(1):132-8.  
52  
53 32-Jackson D, Aveyard P. Waterpipe smoking in students: prevalence, risk factors, symptoms of addiction, and  
54 smoke intake. Evidence from one British university. *BMC Public Health*. 2008; 8:174.  
55  
56  
57  
58  
59  
60

1  
2  
3 33-Ward KD, Eissenberg T, Gray JN, Srinivas V, Wilson N, Maziak W. Characteristics of U.S. waterpipe users: a  
4 preliminary report. *Nicotine Tob Res.* 2007;9(12):1339-46.  
5

6 34-Hudmon, K.S., Marks, J.L., Pomerleau, C.S., Bolt, D.M., Brigham, J., Swan, G.E. A multidimensional model for  
7 characterizing tobacco dependence. *Nicotine & Tobacco Research* 2003 ; 5:655–64.  
8

9 35-Heatheron, T.F., Kozlowski, L.T., Frecker, R.C., Fagerström, K.O. The Fagerström Test for Nicotine Dependence:  
10 a revision of the Fagerström Tolerance Questionnaire. *British Journal of Addiction* 1991 ; 86(9): 1119-27. No DOI  
11 available.  
12

13 36-Rastam S, Eissenberg T, Ibrahim I, Ward KD, Khalil R, Maziak W. Comparative analysis of waterpipe and  
14 cigarette suppression of abstinence and craving symptoms. *Addict Behav.* 2011; 36(5): 555–559  
15

16 37-Greenbaum L, Kanyas K, Karni O, Merbl Y, Olender T, Horowitz A, Yakir A, Lancet D, Ben-Asher E, Lerer B. Why  
17 do young women smoke? I. Direct and interactive effects of environment, psychological characteristics and  
18 nicotinic cholinergic receptor genes. *Mol Psychiatry.* 2006; 11(3):312-22, 223.  
19  
20  
21  
22  
23  
24  
25  
26  
27  
28  
29  
30  
31  
32  
33  
34  
35  
36  
37  
38  
39  
40  
41  
42  
43  
44  
45  
46  
47  
48  
49  
50  
51  
52  
53  
54  
55  
56  
57  
58  
59  
60

**Table 1 – Validity and reliability of the LWDS-11 among university students of Lebanon**

| Items                                                                  | Factor 1<br>Physiological<br>dependence | Factor 2<br>Psychological<br>craving | Factor 3<br>Negative<br>reinforcement | Factor 4<br>Positive<br>reinforcement |
|------------------------------------------------------------------------|-----------------------------------------|--------------------------------------|---------------------------------------|---------------------------------------|
| How many times were you able to stay 7 days without smoking waterpipe? | 0.877                                   |                                      |                                       |                                       |
| How many days could you stay without smoking waterpipe?                | 0.871                                   |                                      |                                       |                                       |
| Number of smoked waterpipes per week?                                  | 0.798                                   |                                      |                                       |                                       |
| Would you smoke waterpipe even if you are ill/ bedridden?              |                                         | 0.836                                |                                       |                                       |
| Are you ready not to eat in exchange for a waterpipe?                  |                                         | 0.827                                |                                       |                                       |
| Would you smoke waterpipe alone?                                       |                                         | 0.547                                |                                       |                                       |
| How much of your income are you ready to pay for waterpipe smoking?    |                                         | 0.426                                |                                       |                                       |
| Smokes waterpipe to relax his nerves                                   |                                         |                                      | 0.868                                 |                                       |
| Smokes waterpipe to improve his morale                                 |                                         |                                      | 0.862                                 |                                       |
| Smokes waterpipe to please others (conviviality)                       |                                         |                                      |                                       | 0.910                                 |
| Smokes waterpipe for pleasure                                          |                                         |                                      |                                       | 0.573                                 |
| Cronbach's alpha reliability measure                                   | 0.806                                   | 0.659                                | 0.671                                 | 0.527                                 |

**Table 2 –LWDS-11 and YACD means in different socio-demographic categories of smokers**

| Characteristic†                  | Total<br>n=3384 | LWDS-11<br>Mean (SD) | p-value | YACD (SD)   | p-value |
|----------------------------------|-----------------|----------------------|---------|-------------|---------|
| Sex                              |                 |                      | 0.082   |             | 0.006   |
| Male                             | 1980(58.5%)     | 10.62(6.21)          |         | 14.22(5.95) |         |
| Female                           | 1399(41.3%)     | 9.86(5.84)           |         | 12.70(5.98) |         |
| Marital status                   |                 |                      | 0.006*  |             | 0.664   |
| Married                          | 115(3.4%)       | 10.00 (4.85)         |         | 14.76(7.65) |         |
| Single                           | 3243(95.8%)     | 10.19(6.02)          |         | 13.84(5.99) |         |
| Widow or divorced                | 9(0.3%)         | 17.50 (6.17)         |         | 11.5(0.00)  |         |
| Socio-economic status quartiles¶ |                 |                      | 0.35    |             | 0.051   |
| Quartile 1                       | 736(21.7%)      | 9.69(5.51)           |         | 15.61(6.09) |         |
| Quartile 2                       | 746(22.0%)      | 10.67(5.78)          |         | 14.11(6.11) |         |
| Quartile 3                       | 632(18.7%)      | 9.68(6.04)           |         | 13.51(5.65) |         |
| Quartile 4                       | 746(22.1%)      | 10.47(6.90)          |         | 13.70(5.95) |         |
| Age classes                      |                 |                      | 0.053** |             | <0.001* |
| 17-19 years                      | 958(28.3%)      | 9.42(5.86)           |         | 11.69(5.37) |         |
| 20-21 years                      | 1424(42.1%)     | 10.75(5.88)          |         | 14.93(5.90) |         |
| 22 years and more                | 982(29.0%)      | 10.14(6.36)          |         | 13.27(6.07) |         |
| Private university               | 1754(51.8%)     | 10.21(6.03)          | 0.422   | 13.33(5.88) | 0.005   |
| Public university                | 1630(48.2%)     | 9.86(6.07)           |         | 14.77(6.09) |         |
| Region                           |                 |                      | 0.135   |             | <0.001† |
| Beyrouth                         | 526(15.5%)      | 10.72(6.62)          |         | 13.21(5.99) |         |
| Mount Lebanon                    | 1606(47.5%)     | 9.55(6.03)           |         | 14.05(5.89) |         |
| North Lebanon                    | 505(14.9%)      | 10.91(4.87)          |         | 15.47(6.43) |         |
| South Lebanon                    | 474(14.0%)      | 10.55(6.21)          |         | 9.99(3.47)  |         |
| Bekaa plain                      | 221(6.5%)       | 9.95(6.07)           |         | 12.28(6.31) |         |
| Number of smokers at home        |                 |                      | <0.001* |             | <0.001‡ |
| No smokers                       | 896(26.5%)      | 9.00(5.51)           |         | 11.98(5.19) |         |
| One smoker                       | 1022(30.2%)     | 8.87 (5.65)          |         | 11.68(5.44) |         |
| Two smokers                      | 722(21.3%)      | 10.21(5.75)          |         | 12.46(5.45) |         |
| Three and more                   | 604(17.8%)      | 12.28(6.42)          |         | 16.21(5.92) |         |

‡ANOVA was used in all comparisons, with Bonferoni adjustment; Kruskal-Wallis non parametric test was used for marital status due to small subgroup size, with further Wilcoxon two-by-two comparison. ¶ Socioeconomic status of students was defined using their mean monthly income per family divided by the number of family members; afterwards, quartiles were calculated and used to classify individuals into four levels; we note that 524(15.5%) gave no valid answer for socio-economic status \*All two by two differences were significant; \*\* Difference significant between the first two categories; # Difference between first and third categories was significant; ‡Difference significant between third category and others is significant; †South Lebanon significantly different from other regions

**Table 3 – LWDS-11 & YACD means bivariate analysis with societal influence**

| Characteristic†                                    | LWDS-11<br>Mean (SD) | p-value  | YACD<br>Mean (SD) | p-value |
|----------------------------------------------------|----------------------|----------|-------------------|---------|
| Successful people smoke                            |                      | <0.001*  |                   | <0.001¶ |
| Yes                                                | 9.93(5.80)           |          | 12.81(5.91)       |         |
| Maybe                                              | 9.61(5.61)           |          | 12.50(5.39)       |         |
| No                                                 | 11.92(6.90)          |          | 16.43(5.66)       |         |
| Cool people smoke                                  |                      | 0.163    |                   | 0.002#  |
| No                                                 | 9.93(6.30)           |          | 12.79(5.91)       |         |
| Maybe                                              | 9.91(5.99)           |          | 13.88(5.95)       |         |
| Yes                                                | 10.79(5.91)          |          | 14.76(5.94)       |         |
| Rich people smoke                                  |                      | 0.002*   |                   | <0.001¶ |
| No                                                 | 10.04(6.21)          |          | 12.71(5.89)       |         |
| Maybe                                              | 9.55(5.60)           |          | 13.72(5.89)       |         |
| Yes                                                | 11.79(5.86)          |          | 16.69(5.35)       |         |
| My idols smoke                                     |                      | 0.030#   |                   | <0.001¶ |
| No                                                 | 10.03(6.09)          |          | 12.49(5.78)       |         |
| Maybe                                              | 9.90(5.69)           |          | 12.86(5.96)       |         |
| Yes                                                | 11.43(6.58)          |          | 16.77(5.65)       |         |
| For my parents, it is important not to smoke       |                      | <0.001*  |                   | <0.001¶ |
| No                                                 | 13.25(6.88)          |          | 16.99(5.24)       |         |
| Maybe                                              | 10.28(6.17)          |          | 16.18(5.51)       |         |
| Yes                                                | 9.78(5.78)           |          | 12.57(5.77)       |         |
| For my friends, it is important not to smoke       |                      | <0.001** |                   | <0.001‡ |
| No                                                 | 12.22(6.50)          |          | 15.49(5.79)       |         |
| Maybe                                              | 10.00(5.65)          |          | 13.26(5.52)       |         |
| Yes                                                | 9.34(5.81)           |          | 13.05(6.19)       |         |
| For people of my age, it is important not to smoke |                      | 0.009*   |                   | 0.088   |
| No                                                 | 11.33(6.31)          |          | 14.53(6.04)       |         |
| Maybe                                              | 9.37(5.69)           |          | 13.45(5.70)       |         |
| Yes                                                | 9.79(6.03)           |          | 13.39(6.06)       |         |

†ANOVA was used in all comparisons, with Bonferoni adjustment; \*All two by two differences were significant; \*\* Difference significant between the first two categories; # Difference between first and third categories was significant; ¶Difference was not significant between categories 1 & 2; ‡Difference was not significant between categories 2 & 3

Table 4 – Multivariate analysis tobacco use and dependence

| <b>Binomial dependent variable</b>           | <b>Logistic regression Independent variables</b> | <b>Adjusted OR</b>                       | <b>[95% of CI]</b>                   | <b>p-value</b> |
|----------------------------------------------|--------------------------------------------------|------------------------------------------|--------------------------------------|----------------|
| Current waterpipe smoking <sup>†,‡</sup>     | Studying in a private university                 | 1.50                                     | [1.26;1.79]                          | <0.001         |
|                                              | Successful people smoke                          | 1.46                                     | [1.29;1.65]                          | <0.001         |
|                                              | Cool people smoke                                | 1.25                                     | [1.12;1.39]                          | <0.001         |
|                                              | Friends think it is important not to smoke       | 0.86                                     | [0.78;0.96]                          | 0.006          |
|                                              | Ever smoking cigarettes                          | 1.80                                     | [1.44;2.26]                          | <0.001         |
|                                              | Female sex versus male                           | 1.00                                     | [0.83;1.21]                          | 0.969          |
|                                              | Higher age class                                 | 1.01                                     | [0.90;1.13]                          | 0.871          |
| Current cigarette smoking <sup>†,‡</sup>     | Female sex versus male                           | 0.24                                     | [0.19;0.29]                          | <0.001         |
|                                              | Other than single marital status                 | 2.63                                     | [1.20;5.76]                          | 0.016          |
|                                              | Higher age class                                 | 1.37                                     | [1.19;1.57]                          | <0.001         |
|                                              | Mount Lebanon versus Beirut                      | 1.37                                     | [1.03;1.82]                          | 0.029          |
|                                              | North Lebanon versus Beirut                      | 1.46                                     | [1.00;2.13]                          | 0.053          |
|                                              | South Lebanon versus Beirut                      | 0.48                                     | [0.30;0.78]                          | 0.003          |
|                                              | Bekaa plain versus Beirut                        | 0.61                                     | [0.36;1.02]                          | 0.057          |
|                                              | Studying in a private university                 | 1.96                                     | [1.58;2.43]                          | <0.001         |
|                                              | Successful people smoke                          | 1.75                                     | [1.52;2.01]                          | <0.001         |
|                                              | My idols smoke                                   | 1.13                                     | [0.99;1.30]                          | 0.074          |
|                                              | Parents think it is important not to smoke       | 0.81                                     | [0.70;0.93]                          | 0.002          |
|                                              | Ever smoking waterpipes                          | 1.56                                     | [1.22;1.99]                          | <0.001         |
| <b>Continuous dependent variable</b>         | <b>Multiple regression Independent variables</b> | <b>Adjusted standardized beta values</b> | <b>Adjusted Beta values [95% CI]</b> | <b>p-value</b> |
| LWDS-11 among WP smokers <sup>*,‡</sup>      | Parents think it is important not to smoke       | -0.124                                   | -1.09[-1.79;-0.28]                   | 0.002          |
|                                              | Friends think it is important not to smoke       | -0.117                                   | -0.87[-1.46;-0.28]                   | 0.004          |
|                                              | My idols smoke                                   | 0.079                                    | 0.63[0.06;1.21]                      | 0.031          |
|                                              | Higher age class                                 | 0.069                                    | 0.58[-0.01;1.17]                     | 0.053          |
|                                              | Female sex versus Male                           | -0.019                                   | -0.23[-1.09;0.64]                    | 0.609          |
| YACD among cigarette smokers <sup>**,‡</sup> | Parents think it is important not to smoke       | -0.24                                    | -1.87[-2.45;-1.29]                   | <0.001         |
|                                              | My idols smoke                                   | 0.16                                     | 1.18[0.56;1.80]                      | <0.001         |
|                                              | Rich people smoke                                | 0.13                                     | 0.97[0.37;1.57]                      | 0.002          |
|                                              | Successful people smoke                          | 0.08                                     | 0.56[-0.02;1.14]                     | 0.059          |
|                                              | Higher age class                                 | 0.07                                     | 0.58[-0.06;1.21]                     | 0.075          |
|                                              | Female sex versus male                           | -0.06                                    | -0.77[-1.77;0.24]                    | 0.136          |

<sup>†</sup>Performed on whole university students sample; Conditions for sample adequacy satisfied; stepwise backward model; all other variables were not retained in the model. **Gender and age class were forced in the models.**

<sup>\*</sup>R=0.255; Adjusted R square=0.065; Stepwise model; VIF<2; residuals are normal; all other variables were not retained in the model. **Gender and age class were forced in the models.**

<sup>\*\*</sup>R=0.426; Adjusted R square=0.175; Stepwise model; VIF<2; residual are normal; all other variables were not retained in the model. **Gender and age class were forced in the models.**

<sup>‡</sup>Variables included in all models: marital status, socioeconomic classes, region of residence, private university (versus public), successful people smoke, cool people smoke, rich people smoke, my idols smoke, parents think it is important not to smoke, friends think it is important not to smoke, people of the same age think it is important not to smoke, smoking other type of tobacco. **Gender and age class were forced in the models.**

## STROBE Statement—checklist of items that should be included in reports of observational studies

|                          | Item No | Recommendation                                                                                                                                                                                                                                                                                                                                                                                                                                                         | Reported on page |
|--------------------------|---------|------------------------------------------------------------------------------------------------------------------------------------------------------------------------------------------------------------------------------------------------------------------------------------------------------------------------------------------------------------------------------------------------------------------------------------------------------------------------|------------------|
| Title and abstract       | 1       | (a) Indicate the study's design with a commonly used term in the title or the abstract                                                                                                                                                                                                                                                                                                                                                                                 | 3                |
|                          |         | (b) Provide in the abstract an informative and balanced summary of what was done and what was found                                                                                                                                                                                                                                                                                                                                                                    | 3                |
| <b>Introduction</b>      |         |                                                                                                                                                                                                                                                                                                                                                                                                                                                                        |                  |
| Background/rationale     | 2       | Explain the scientific background and rationale for the investigation being reported                                                                                                                                                                                                                                                                                                                                                                                   | 4                |
| Objectives               | 3       | State specific objectives, including any prespecified hypotheses                                                                                                                                                                                                                                                                                                                                                                                                       | 5                |
| <b>Methods</b>           |         |                                                                                                                                                                                                                                                                                                                                                                                                                                                                        |                  |
| Study design             | 4       | Present key elements of study design early in the paper                                                                                                                                                                                                                                                                                                                                                                                                                | 6                |
| Setting                  | 5       | Describe the setting, locations, and relevant dates, including periods of recruitment, exposure, follow-up, and data collection                                                                                                                                                                                                                                                                                                                                        | 6                |
| Participants             | 6       | (a) <i>Cohort study</i> —Give the eligibility criteria, and the sources and methods of selection of participants. Describe methods of follow-up<br><i>Case-control study</i> —Give the eligibility criteria, and the sources and methods of case ascertainment and control selection. Give the rationale for the choice of cases and controls<br><i>Cross-sectional study</i> —Give the eligibility criteria, and the sources and methods of selection of participants | 6                |
|                          |         | (b) <i>Cohort study</i> —For matched studies, give matching criteria and number of exposed and unexposed<br><i>Case-control study</i> —For matched studies, give matching criteria and the number of controls per case                                                                                                                                                                                                                                                 | NA               |
| Variables                | 7       | Clearly define all outcomes, exposures, predictors, potential confounders, and effect modifiers. Give diagnostic criteria, if applicable                                                                                                                                                                                                                                                                                                                               | 7-8              |
| Data sources/measurement | 8*      | For each variable of interest, give sources of data and details of methods of assessment (measurement). Describe comparability of assessment methods if there is more than one group                                                                                                                                                                                                                                                                                   | 7-8              |
| Bias                     | 9       | Describe any efforts to address potential sources of bias                                                                                                                                                                                                                                                                                                                                                                                                              | 6-7              |
| Study size               | 10      | Explain how the study size was arrived at                                                                                                                                                                                                                                                                                                                                                                                                                              | 6                |
| Quantitative variables   | 11      | Explain how quantitative variables were handled in the analyses. If applicable, describe which groupings were chosen and why                                                                                                                                                                                                                                                                                                                                           | 7-8              |
| Statistical methods      | 12      | (a) Describe all statistical methods, including those used to control for confounding                                                                                                                                                                                                                                                                                                                                                                                  | 7-8              |
|                          |         | (b) Describe any methods used to examine subgroups and interactions                                                                                                                                                                                                                                                                                                                                                                                                    | NA               |
|                          |         | (c) Explain how missing data were addressed                                                                                                                                                                                                                                                                                                                                                                                                                            | 8                |
|                          |         | (d) <i>Cohort study</i> —If applicable, explain how loss to follow-up was addressed<br><i>Case-control study</i> —If applicable, explain how matching of cases and controls was addressed<br><i>Cross-sectional study</i> —If applicable, describe analytical methods taking account of sampling strategy                                                                                                                                                              | 7                |
|                          |         | (e) Describe any sensitivity analyses                                                                                                                                                                                                                                                                                                                                                                                                                                  | NA               |



| <b>Results</b>           |     |                                                                                                                                                                                                              |       |
|--------------------------|-----|--------------------------------------------------------------------------------------------------------------------------------------------------------------------------------------------------------------|-------|
| Participants             | 13* | (a) Report numbers of individuals at each stage of study—eg numbers potentially eligible, examined for eligibility, confirmed eligible, included in the study, completing follow-up, and analysed            | 9     |
|                          |     | (b) Give reasons for non-participation at each stage                                                                                                                                                         | NA    |
|                          |     | (c) Consider use of a flow diagram                                                                                                                                                                           | NA    |
| Descriptive data         | 14* | (a) Give characteristics of study participants (eg demographic, clinical, social) and information on exposures and potential confounders                                                                     | 9     |
|                          |     | (b) Indicate number of participants with missing data for each variable of interest                                                                                                                          | 9     |
|                          |     | (c) <i>Cohort study</i> —Summarise follow-up time (eg, average and total amount)                                                                                                                             | NA    |
| Outcome data             | 15* | <i>Cohort study</i> —Report numbers of outcome events or summary measures over time                                                                                                                          | NA    |
|                          |     | <i>Case-control study</i> —Report numbers in each exposure category, or summary measures of exposure                                                                                                         | NA    |
|                          |     | <i>Cross-sectional study</i> —Report numbers of outcome events or summary measures                                                                                                                           | 9     |
| Main results             | 16  | (a) Give unadjusted estimates and, if applicable, confounder-adjusted estimates and their precision (eg, 95% confidence interval). Make clear which confounders were adjusted for and why they were included | 10-11 |
|                          |     | (b) Report category boundaries when continuous variables were categorized                                                                                                                                    | NA    |
|                          |     | (c) If relevant, consider translating estimates of relative risk into absolute risk for a meaningful time period                                                                                             | NA    |
| Other analyses           | 17  | Report other analyses done—eg analyses of subgroups and interactions, and sensitivity analyses                                                                                                               | 9-10  |
| <b>Discussion</b>        |     |                                                                                                                                                                                                              |       |
| Key results              | 18  | Summarise key results with reference to study objectives                                                                                                                                                     | 12    |
| Limitations              | 19  | Discuss limitations of the study, taking into account sources of potential bias or imprecision. Discuss both direction and magnitude of any potential bias                                                   | 14    |
| Interpretation           | 20  | Give a cautious overall interpretation of results considering objectives, limitations, multiplicity of analyses, results from similar studies, and other relevant evidence                                   | 12-13 |
| Generalisability         | 21  | Discuss the generalisability (external validity) of the study results                                                                                                                                        | 14    |
| <b>Other information</b> |     |                                                                                                                                                                                                              |       |
| Funding                  | 22  | Give the source of funding and the role of the funders for the present study and, if applicable, for the original study on which the present article is based                                                | 2     |

\*Give information separately for cases and controls in case-control studies and, if applicable, for exposed and unexposed groups in cohort and cross-sectional studies.

**Note:** An Explanation and Elaboration article discusses each checklist item and gives methodological background and published examples of transparent reporting. The STROBE checklist is best used in conjunction with this article (freely available on the Web sites of PLoS Medicine at <http://www.plosmedicine.org/>, Annals of Internal Medicine at <http://www.annals.org/>, and Epidemiology at <http://www.epidem.com/>). Information on the STROBE Initiative is available at [www.strobe-statement.org](http://www.strobe-statement.org).

Von Elm E, Altman DG, Egger M, Pocock SJ, Gøtzsche PC, Vandenbroucke JP; STROBE Initiative. The Strengthening the Reporting of Observational Studies in Epidemiology (STROBE) statement: guidelines for reporting observational studies. *Lancet* 2007; **370**:1453-7
